# Supplementary material for: Stabilization of intermediate Mo oxidation states by Nb doping enhancing methane aromatization on Mo/HZSM-5 catalysts
Source: Royal Society of Chemistry journal article supplement (doi:10.1039/d3ta07532j), 2024-01-01
Supplement: d3ta07532j1.pdf [file d3ta07532j1.pdf]

## Electronic Supporting Information

### **Stabilization of Intermediate Mo Oxidation states by Nb Doping Enhancing Methane Aromatization on Mo/HZSM-5 Catalysts**

Stefan Peters<sup>1</sup>, Stephan Bartling<sup>1</sup>, Magdalena Parlinska-Wojtan<sup>2</sup>, Alexander Wotzka<sup>1</sup>,  
Ana Guilherme Buzanich<sup>3</sup>, Sebastian Wohlrab<sup>1</sup>, Ali M. Abdel-Mageed<sup>1</sup>✉

<sup>1</sup> Leibniz Institute for Catalysis (LIKAT Rostock), 18059 Rostock, Germany

<sup>2</sup> Institute of Nuclear Physics, Polish Academy of Sciences, 31-342 Krakow, Poland

<sup>3</sup> Federal Institute for Materials Research and Testing (BAM), 12489 Berlin, Germany

Corresponding author: [ali.abdelmageed@catalysis.de](mailto:ali.abdelmageed@catalysis.de)

**Table of contents:**

|                    |                                                                                                                            |          |
|--------------------|----------------------------------------------------------------------------------------------------------------------------|----------|
| <b>Table S1:</b>   | Summary of MDA results under different reaction conditions                                                                 | page S4  |
| <b>Table S2:</b>   | Summary of TGA/DSC results of spent catalysts                                                                              | page S5  |
| <b>Table S3:</b>   | N <sub>2</sub> sorption results of fresh, spent and regenerated catalysts                                                  | page S6  |
| <b>Table S4:</b>   | NAP-XPS quantification of 6Mo1Nb/HZSM-5                                                                                    | page S7  |
| <b>Figure S1:</b>  | Graphical presentation of the setup used in catalytic measurements                                                         | page S8  |
| <b>Figure S2:</b>  | Reproducibility experiments                                                                                                | page S9  |
| <b>Figure S3:</b>  | NH <sub>3</sub> -TPD results for HZSM-5 and selected fresh catalysts                                                       | page S10 |
| <b>Figure S4:</b>  | XRD patterns of HZSM-5 and selected fresh catalysts                                                                        | page S11 |
| <b>Figure S5:</b>  | Time-on-stream benzene yields of 6Mo/HZSM-5 catalysts promoted with different metals including Fe, Co, Zn and Nb           | page S12 |
| <b>Figure S6:</b>  | Calculated product yields for MDA on 6Mo/HZSM-5 and 6Mo1Nb/HZSM-5 catalysts at different space velocities                  | page S13 |
| <b>Figure S7:</b>  | Time-on-stream CH <sub>4</sub> conversions on 6Mo/HZSM-5 and 6Mo1Nb/HZSM-5 catalysts at different reaction temperatures    | page S14 |
| <b>Figure S8:</b>  | Time-on-stream benzene and naphthalene yields on 6Mo/HZSM-5 and 6Mo1Nb/HZSM-5 catalysts at different reaction temperatures | page S15 |
| <b>Figure S9:</b>  | Calculated product yields for MDA on 6Mo/HZSM-5 and 6Mo1Nb/HZSM-5 catalysts at different reaction temperatures             | page S16 |
| <b>Figure S10:</b> | Time-on-stream CO selectivities on 6Mo/HZSM-5 and 6Mo1Nb/HZSM-5 catalysts at different reaction temperatures               | page S17 |
| <b>Figure S11:</b> | Time-on-stream benzene yields on 6Mo/HZSM-5 and 6Mo1Nb/HZSM-5 catalysts during reaction / regeneration cycles              | page S18 |
| <b>Figure S12:</b> | TGA/DSC analysis of fresh 6Mo/HZSM-5                                                                                       | page S19 |
| <b>Figure S13:</b> | Comparative TGA/DSC measurements of spent 6Mo/HZSM-5 and 6Mo1Nb/HZSM-5 at higher space velocity                            | page S20 |
| <b>Figure S14:</b> | TGA of regenerated 6Mo/HZSM-5 and 6Mo1Nb/HZSM-5                                                                            | page S21 |
| <b>Figure S15:</b> | Additional STEM micrographs of fresh 6Mo1Nb/HZSM-5 catalyst                                                                | page S22 |
| <b>Figure S16:</b> | STEM and EDS mapping of spent 6Mo1Nb/HZSM-5 catalyst                                                                       | page S23 |
| <b>Figure S17:</b> | Additional STEM micrographs of spent 6Mo1Nb/HZSM-5 catalyst                                                                | page S24 |
| <b>Figure S18:</b> | XRD patterns of fresh, spent, and regenerated 6Mo/HZSM-5 and 6Mo1Nb/HZSM-5 catalysts                                       | page S25 |
| <b>Figure S19:</b> | High-resolution BF-STEM micrograph of spent 6Mo1Nb/HZSM-5 catalyst showing a thin layer of carbon on Mo-Nb particles       | page S26 |
| <b>Figure S20:</b> | STEM micrographs and Mo-Nb particle size distribution of the regenerated 6Mo1Nb/HZSM-5 catalyst                            | page S27 |

|                    |                                                                                                                 |          |
|--------------------|-----------------------------------------------------------------------------------------------------------------|----------|
| <b>Figure S21:</b> | STEM micrographs and Mo particle size distribution of the regenerated 6Mo/HZSM-5 catalyst                       | page S28 |
| <b>Figure S22:</b> | N <sub>2</sub> sorption isotherms of fresh, spent and regenerated 6Mo/HZSM-5 and 6Mo1Nb/HZSM-5 catalysts        | page S29 |
| <b>Figure S23:</b> | H <sub>2</sub> -TPR curves of 6Mo/HZSM-5 and 6Mo1Nb/HZSM-5 catalysts                                            | page S30 |
| <b>Figure S24:</b> | XPS at Mo 3d level of 6Mo/HZSM-5 and 6Mo1Nb/HZSM-5 catalysts after 4 consecutive reaction / regeneration cycles | page S31 |
| <b>Figure S25:</b> | XPS at Nb 3d level of spent 1Nb/HZSM-5 catalyst                                                                 | page S32 |
| <b>Figure S26:</b> | <i>In situ</i> NAP-XPS at Nb 3d level of 6Mo1Nb/HZSM-5 catalyst                                                 | page S33 |
| <b>Figure S27:</b> | Derivative of XANES for selected Mo reference materials                                                         | page S34 |
| <b>References</b>  | Additional literature references for the SI                                                                     | page S35 |

**Table S1:** Methane conversions and major product selectivities ( $S > 1\%$ ) under different MDA reaction conditions for 6Mo/HZSM-5 and 6Mo1Nb/HZSM-5. Values are given as arithmetic means of 12 measurements over 360 min of reaction.

| mean conversions $X$ and product selectivities $S$ [%] |           |                                                               |                           |                                         |                                         |                                         |                                         |                                           |               |
|--------------------------------------------------------|-----------|---------------------------------------------------------------|---------------------------|-----------------------------------------|-----------------------------------------|-----------------------------------------|-----------------------------------------|-------------------------------------------|---------------|
| Catalyst                                               | T<br>[°C] | GHSV<br>[SCC g <sub>cat</sub> <sup>-1</sup> h <sup>-1</sup> ] | $X$<br>[CH <sub>4</sub> ] | $S$<br>[C <sub>2</sub> H <sub>4</sub> ] | $S$<br>[C <sub>2</sub> H <sub>6</sub> ] | $S$<br>[C <sub>6</sub> H <sub>6</sub> ] | $S$<br>[C <sub>7</sub> H <sub>8</sub> ] | $S$<br>[C <sub>10</sub> H <sub>10</sub> ] | $S$<br>[coke] |
| 6Mo                                                    | 700       | 1600                                                          | 8.42                      | 4.30                                    | 1.81                                    | 57.23                                   | 3.31                                    | 12.36                                     | 20.17         |
|                                                        | 700       | 3200                                                          | 6.25                      | 7.81                                    | 2.14                                    | 60.36                                   | 4.40                                    | 8.75                                      | 15.21         |
|                                                        | 700       | 4800                                                          | 5.06                      | 10.80                                   | 2.19                                    | 54.38                                   | 3.35                                    | 4.16                                      | 23.91         |
|                                                        | 650       | 3200                                                          | 4.41                      | 5.53                                    | 2.95                                    | 53.24                                   | 3.66                                    | 7.89                                      | 25.34         |
|                                                        | 600       | 3200                                                          | 2.75                      | 4.83                                    | 4.11                                    | 45.01                                   | 3.27                                    | 7.08                                      | 30.15         |
| 6Mo1Nb                                                 | 700       | 1600                                                          | 8.39                      | 4.27                                    | 1.82                                    | 57.80                                   | 3.27                                    | 12.29                                     | 19.66         |
|                                                        | 700       | 3200                                                          | 6.43                      | 7.58                                    | 2.16                                    | 61.01                                   | 4.44                                    | 8.97                                      | 14.49         |
|                                                        | 700       | 4800                                                          | 5.10                      | 10.87                                   | 2.26                                    | 58.67                                   | 3.48                                    | 4.35                                      | 19.17         |
|                                                        | 650       | 3200                                                          | 4.51                      | 5.33                                    | 2.91                                    | 55.74                                   | 3.66                                    | 8.39                                      | 22.63         |
|                                                        | 600       | 3200                                                          | 2.63                      | 4.69                                    | 4.36                                    | 49.53                                   | 3.37                                    | 8.40                                      | 23.65         |

**Table S2:** TGA/DSC measurement results of spent 6Mo/HZSM-5 and 6Mo1Nb/HZSM-5 catalysts after reaction at different reaction conditions for 360 min on stream. Mass losses refer to change in sample mass from 300-700 °C to omit adsorbed species like water.

| <b>Catalyst</b> | <b>T<sub>react</sub> [°C]</b> | <b>GHSV [SCC g<sub>cat</sub><sup>-1</sup> h<sup>-1</sup>]</b> | <b>DSC peak [°C]</b> | <b>Mass loss [%]</b> |
|-----------------|-------------------------------|---------------------------------------------------------------|----------------------|----------------------|
| 6Mo             | 700                           | 3200                                                          | 464.7                | 4.25                 |
| 6Mo1Nb          | 700                           | 3200                                                          | 469.4                | 4.13                 |
| 6Mo             | 700                           | 1600                                                          | 464.1                | 2.21                 |
| 6Mo1Nb          | 700                           | 1600                                                          | 468.1                | 1.52                 |
| 6Mo             | 700                           | 4800                                                          | 466.9                | 4.07                 |
| 6Mo1Nb          | 700                           | 4800                                                          | 467.5                | 4.62                 |
| 6Mo             | 650                           | 3200                                                          | 432.6                | 3.37                 |
| 6Mo1Nb          | 650                           | 3200                                                          | 443.5                | 2.84                 |
| 6Mo             | 600                           | 3200                                                          | 421.4                | 3.22                 |
| 6Mo1Nb          | 600                           | 3200                                                          | 428.9                | 2.54                 |

**Table S3:** N<sub>2</sub> sorption characteristics (specific surface area  $S_{BET}$ , micropore area  $S_{micro}$ , external surface area  $S_{ext}$  as well as total pore volume  $V_{total}$  and micropore volume  $V_{micro}$ ) for the catalysts at different stages. “Fresh” denotes samples after calcination but before reaction, “spent” after 360 min of reaction (700 °C, 3200 mL g<sub>cat</sub><sup>-1</sup> h<sup>-1</sup>) and “reg.” after four reaction-regeneration cycles (total time on stream 24 h).

| <b>Catalyst</b> | <b><math>S_{BET}</math> [m<sup>2</sup> g<sup>-1</sup>]</b> | <b><math>S_{micro}</math> [m<sup>2</sup> g<sup>-1</sup>]</b> | <b><math>S_{ext}</math> [m<sup>2</sup> g<sup>-1</sup>]</b> | <b><math>V_{total}</math> [mL g<sup>-1</sup>]</b> | <b><math>V_{micro}</math> [mL g<sup>-1</sup>]</b> |
|-----------------|------------------------------------------------------------|--------------------------------------------------------------|------------------------------------------------------------|---------------------------------------------------|---------------------------------------------------|
| 6Mo fresh       | 328                                                        | 280                                                          | 48                                                         | 0.264                                             | 0.118                                             |
| 6Mo1Nb fresh    | 318                                                        | 260                                                          | 58                                                         | 0.242                                             | 0.110                                             |
| 6Mo spent       | 273                                                        | 241                                                          | 32                                                         | 0.200                                             | 0.096                                             |
| 6Mo1Nb spent    | 271                                                        | 242                                                          | 29                                                         | 0.183                                             | 0.097                                             |
| 6Mo reg.        | 253                                                        | 224                                                          | 29                                                         | 0.201                                             | 0.092                                             |
| 6Mo1Nb reg.     | 280                                                        | 250                                                          | 30                                                         | 0.195                                             | 0.102                                             |

**Table S4:** Surface elemental compositions of 6Mo1Nb/HZSM-5 determined by *in situ* NAP-XPS in an atmosphere of 90 % CH<sub>4</sub> / 10 % N<sub>2</sub> (total pressure 2 mbar) unless specified otherwise. Times are measured after reaching 627 °C to represent time under reaction conditions. Values are given in at.%; Al was not considered in the quantification. Nb<sup>x+</sup> refers to the Nb species with higher binding energy compared to Nb<sup>5+</sup> (see also Figures 7 and S19). As reported previously, the reduced pressure employed during NAP-XPS is likely the cause of the increase in absolute surface concentration of Mo compared to our *ex situ* samples.<sup>1,2</sup>

| <b>Conditions</b>      | C   | Si   | O    | Mo <sup>6+</sup> | Mo <sup>5+</sup> | Mo <sup>4+</sup> | Mo <sup>2+</sup> | Nb <sup>5+</sup> | Nb <sup>x+</sup> | Nb <sup>4+</sup> |
|------------------------|-----|------|------|------------------|------------------|------------------|------------------|------------------|------------------|------------------|
| 127 °C, N <sub>2</sub> | 4.2 | 29.2 | 62.7 | 3.1              | 0.19             | 0                | 0                | 0.72             | 0                | 0                |
| 127 °C                 | 7.4 | 28.0 | 60.6 | 2.4              | 0.82             | 0                | 0                | 0.75             | 0                | 0                |
| 627 °C, 0.2 h          | 6.3 | 25.9 | 60.3 | 1.6              | 1.4              | 3.9              | 0                | 0.48             | 0.08             | 0.05             |
| 627 °C, 2.2 h          | 9.0 | 25.6 | 56.8 | 1.6              | 0.51             | 6.0              | 1.0              | 0.32             | 0.16             | 0.13             |
| 627 °C, 5.4 h          | 9.6 | 23.9 | 54.0 | 1.3              | 0.53             | 6.5              | 3.6              | 0.30             | 0.18             | 0.05             |

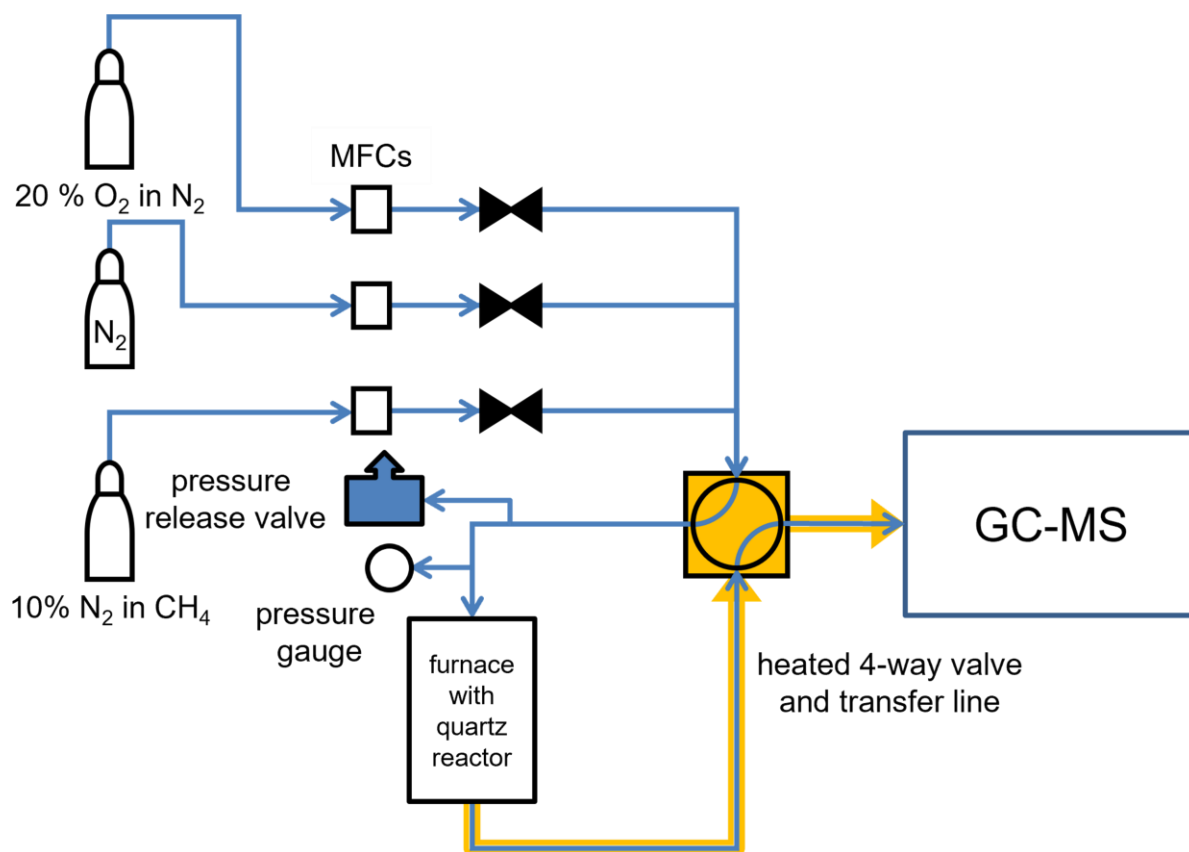

**Figure S1:** Experimental setup used in performing the catalytic dehydroaromatization measurements.



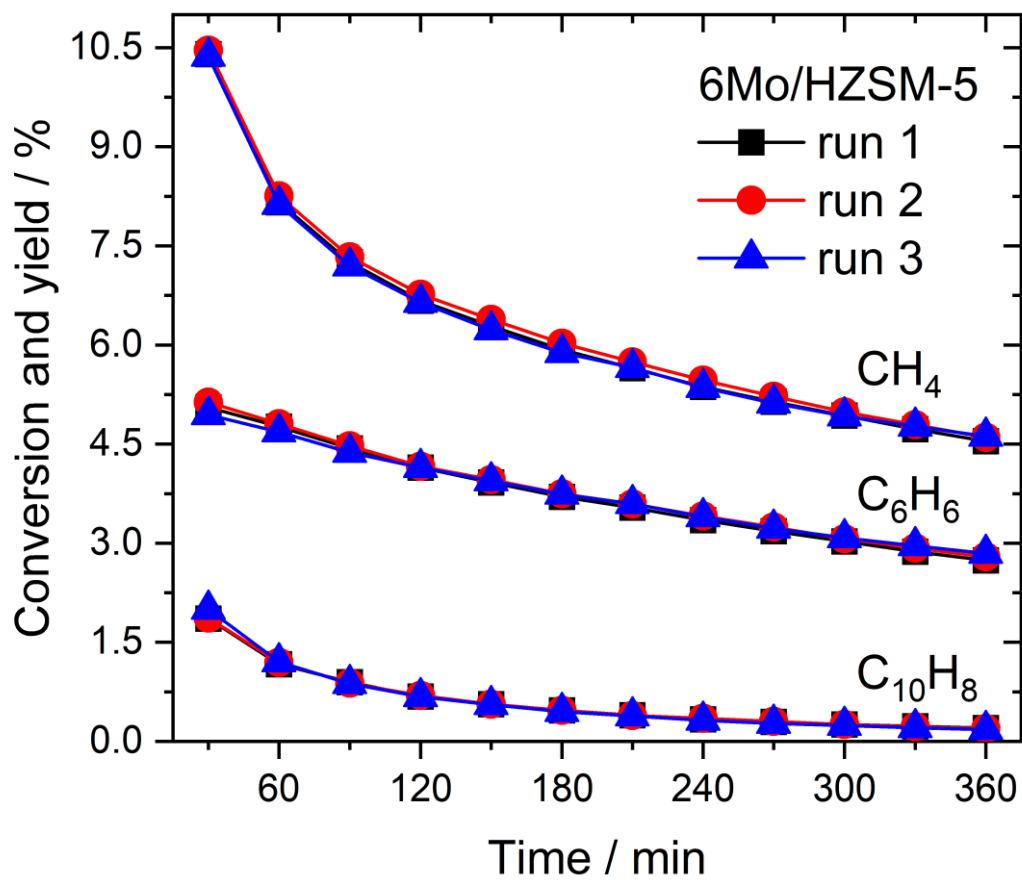

**Figure S2:** Methane conversions and yields of benzene and naphthalene from MDA reproducibility experiments performed on 6Mo/HZSM-5 under the same reaction conditions (300 mg catalyst, 3200 SCC g<sub>cat</sub><sup>-1</sup> h<sup>-1</sup>, 700 °C).

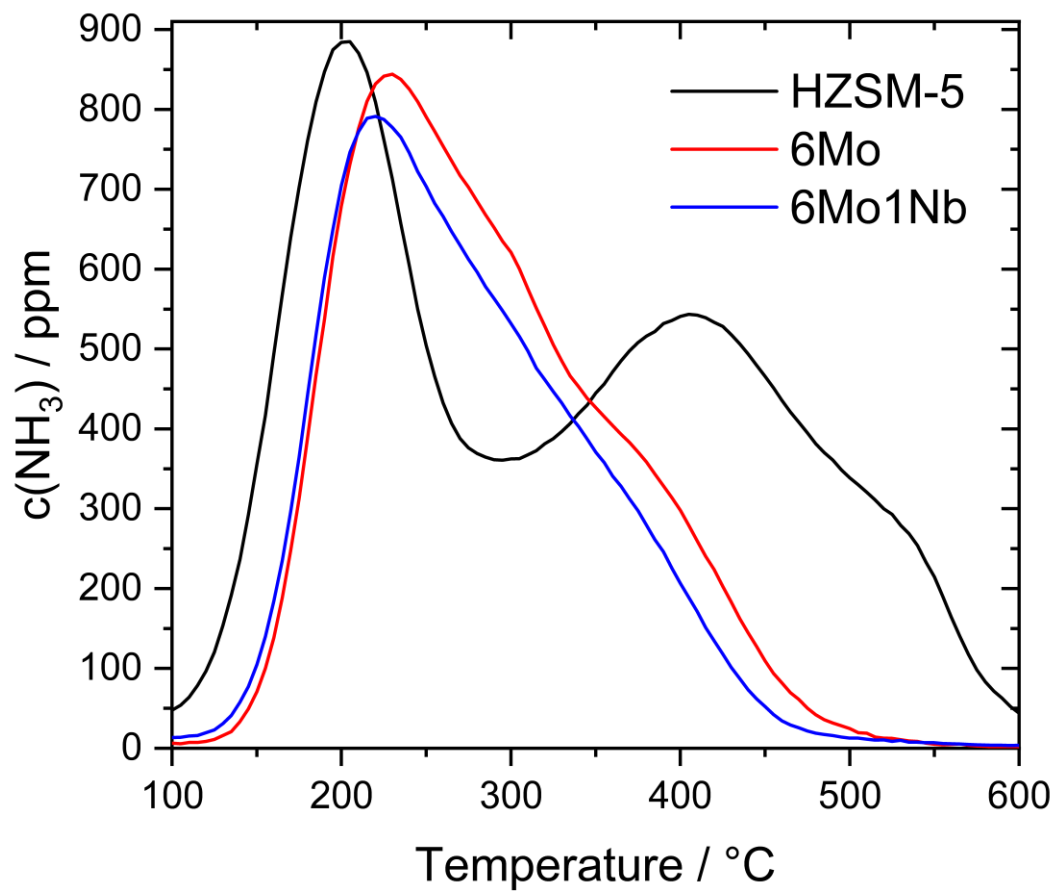

**Figure S3:** Temperature-programmed ammonia desorption ( $\text{NH}_3$ -TPD) measurements on the HZSM-5 support as well as the 6.3 wt.% Mo/HZSM-5 (6Mo) and 6.3 wt.% Mo + 1 wt.% Nb/HZSM-5 (6Mo1Nb) catalysts.

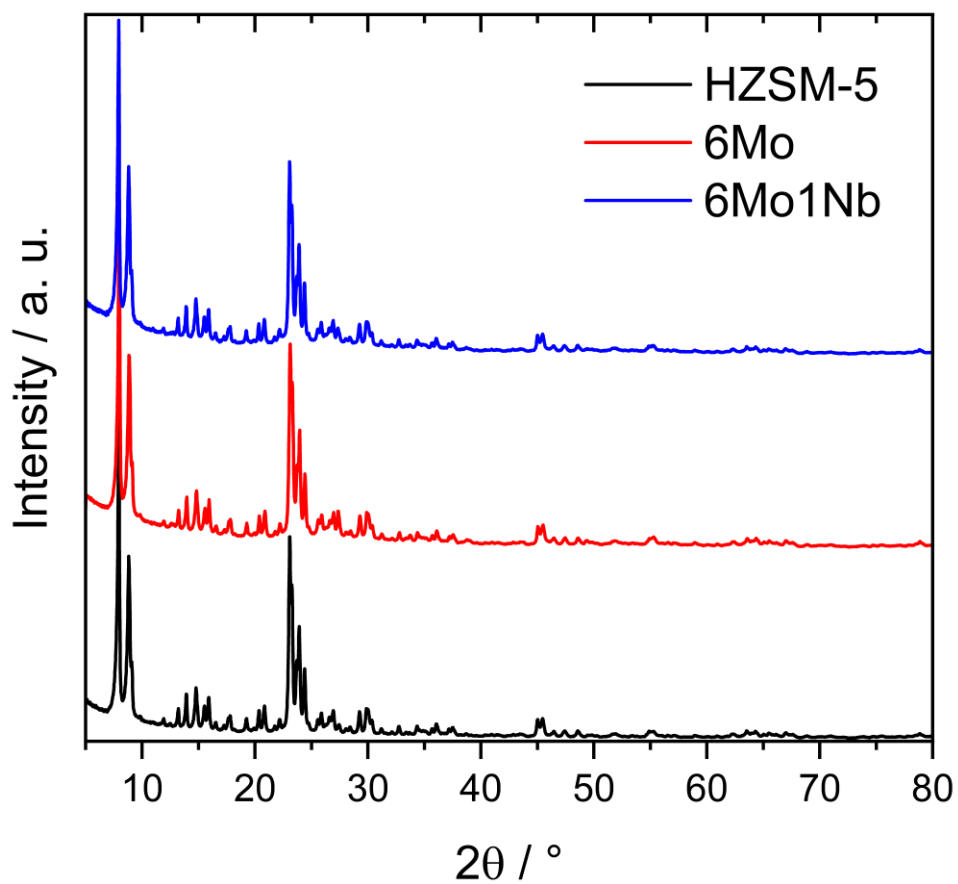

**Figure S4:** normalized X-ray diffraction (XRD) patterns (obtained with Cu  $K\alpha$  radiation) of HZSM-5 support as well as fresh 6Mo/HZSM-5 and 6Mo1Nb/HZSM-5 catalyst samples.

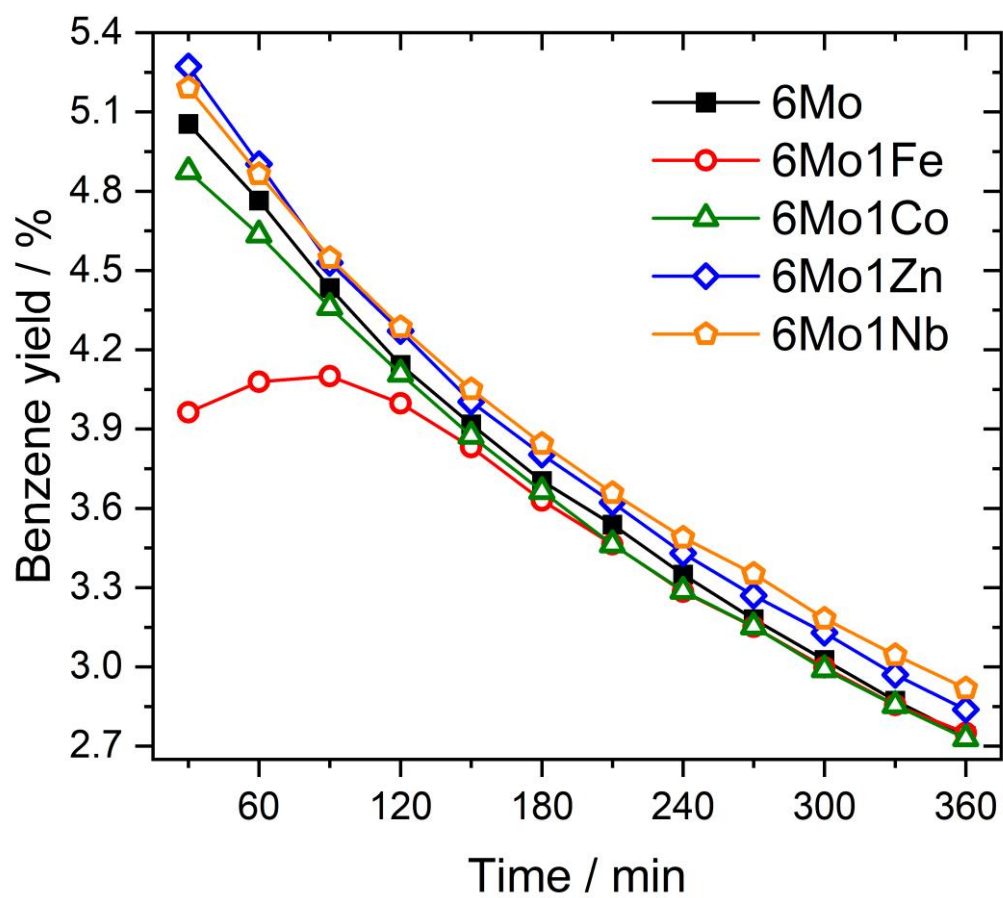

**Figure S5:** benzene yields over time for MDA on a selection of promoted 6Mo/HZSM-5 catalysts. Reaction conditions: 700 °C, 300 mg catalyst, 90 % CH<sub>4</sub> + 10 % N<sub>2</sub>, 3200 SCC g<sub>cat</sub><sup>-1</sup> h<sup>-1</sup>.

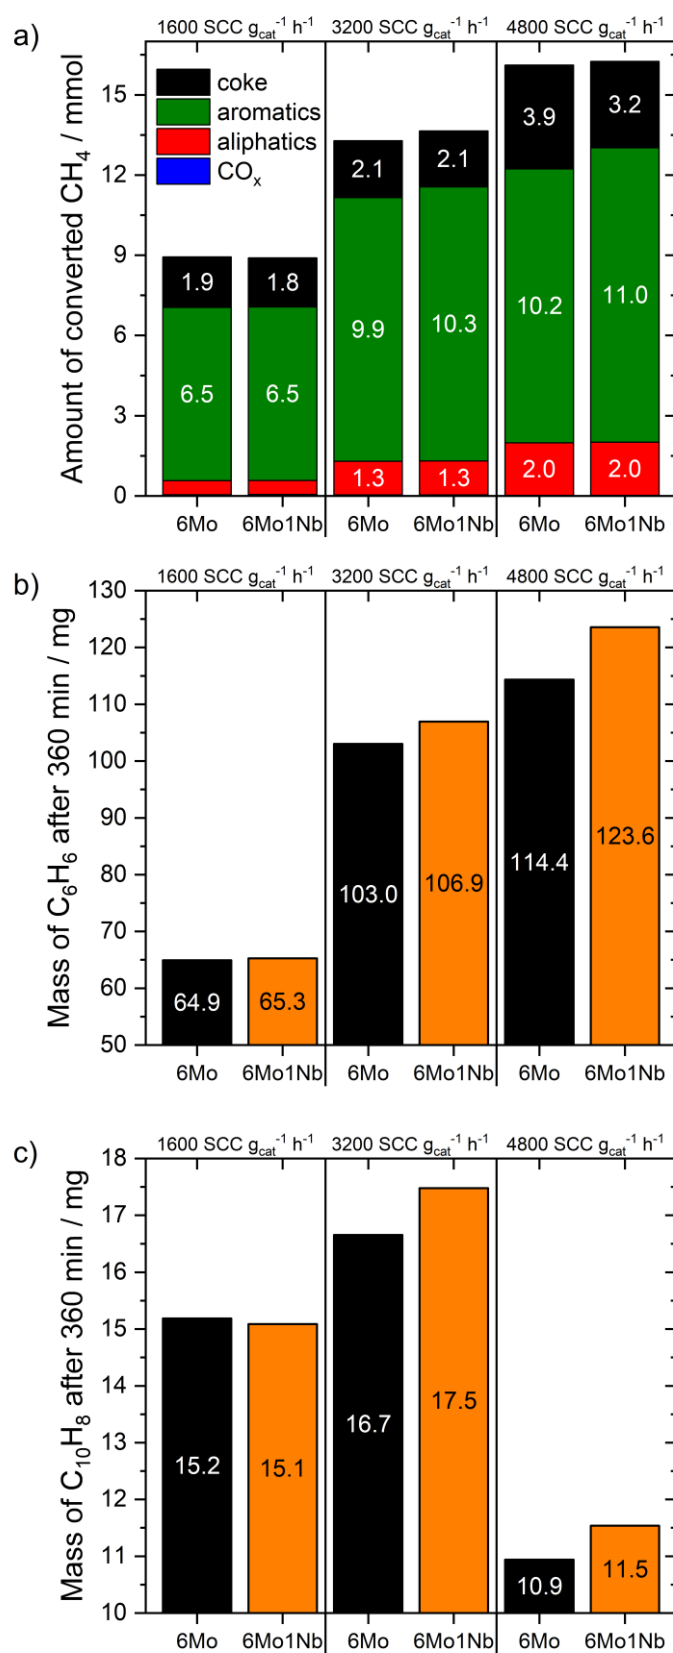

**Figure S6:** molar amounts of methane converted to different product categories during 360 min of MDA reaction (a) and amounts of benzene (b) and naphthalene (c) with different space velocities. Values were calculated from the yields of the respective products.

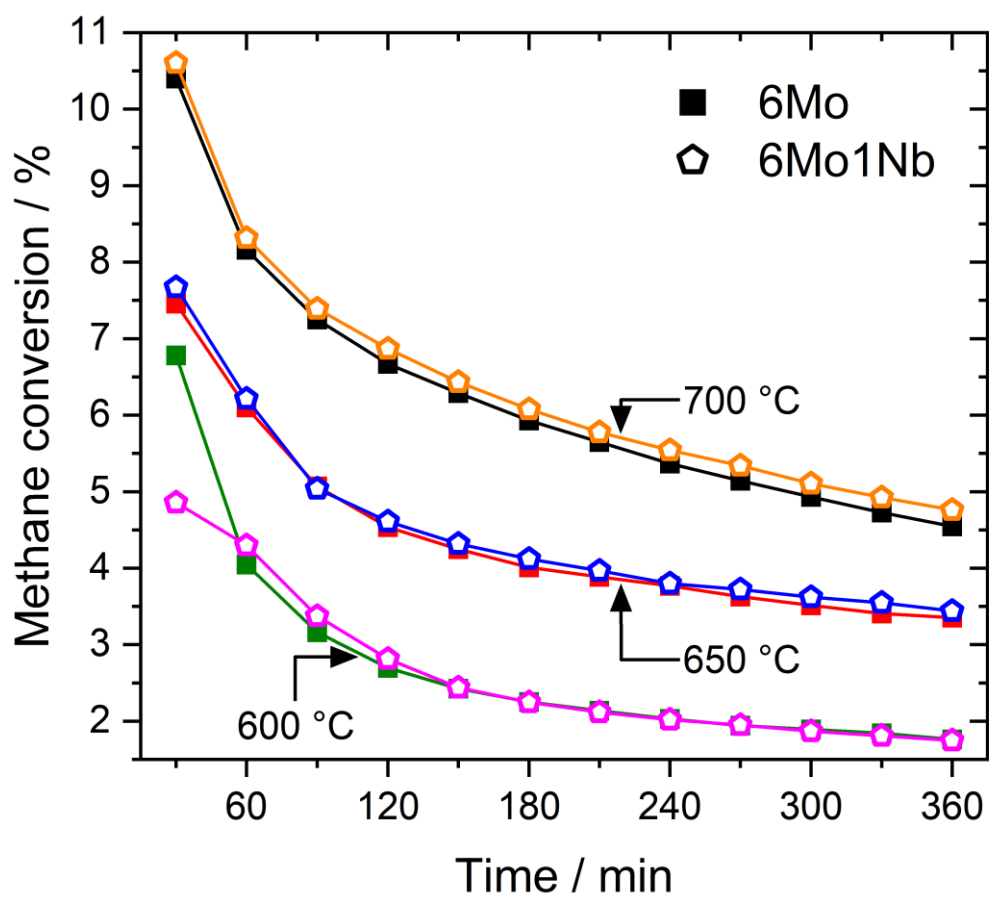

**Figure S7:** methane conversions over time for MDA on 6Mo/HZSM-5 and 6Mo1Nb/HZSM-5 catalysts at different temperatures. Reaction conditions: 300 mg catalyst, 90 % CH<sub>4</sub> + 10 % N<sub>2</sub>, 3200 SCC g<sub>cat</sub><sup>-1</sup> h<sup>-1</sup>.

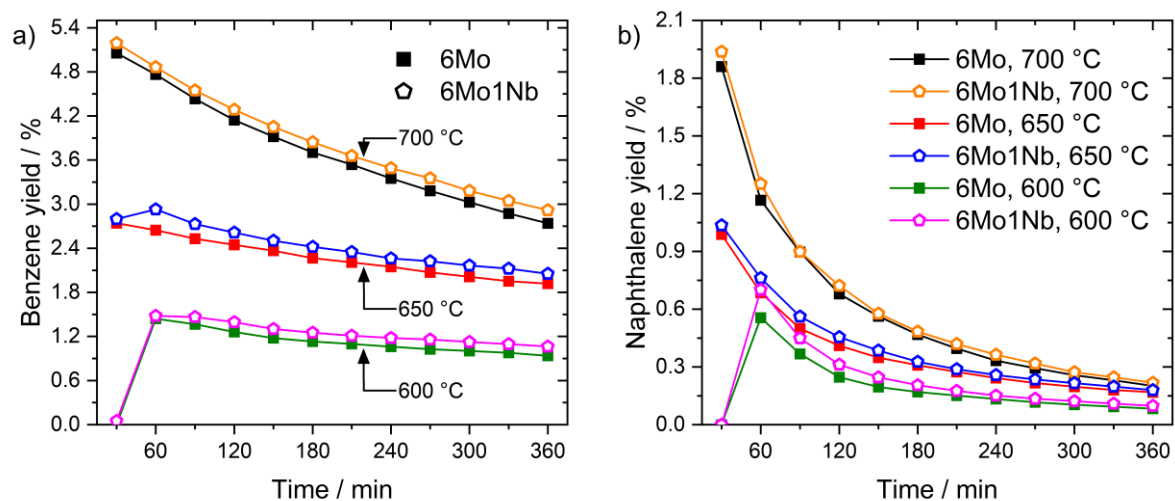

**Figure S8:** benzene (a) and naphthalene yields (b) over time for MDA on 6Mo/HZSM-5 and 6Mo1Nb/HZSM-5 catalysts at different temperatures. Reaction conditions: 300 mg catalyst, 90 % CH<sub>4</sub> + 10 % N<sub>2</sub>, 3200 SCC g<sub>cat</sub><sup>-1</sup> h<sup>-1</sup>.

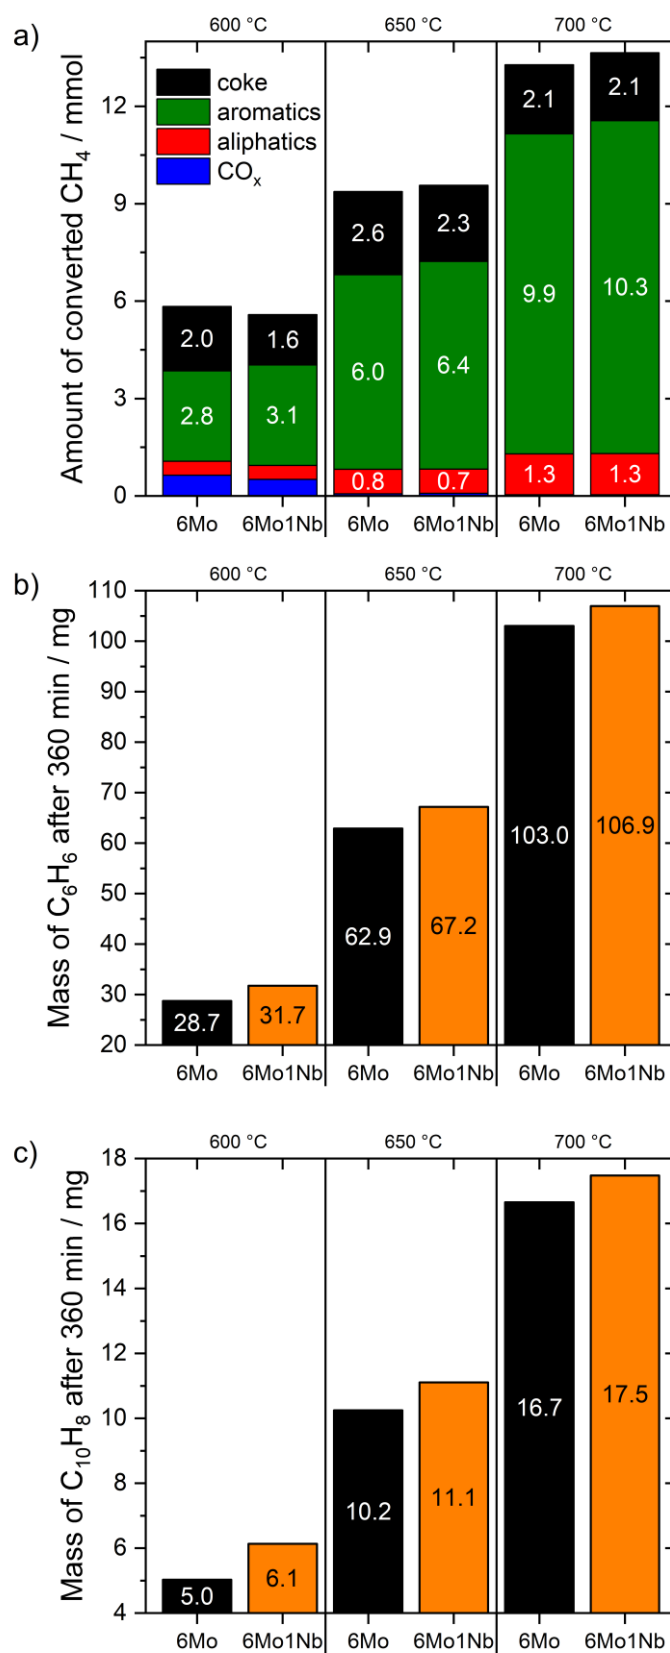

**Figure S9:** Molar amounts of methane converted to different product categories during 360 min of MDA reaction (a) and amounts of benzene (b) and naphthalene (c) with different reaction temperatures. Values were calculated from the yields of the respective products.



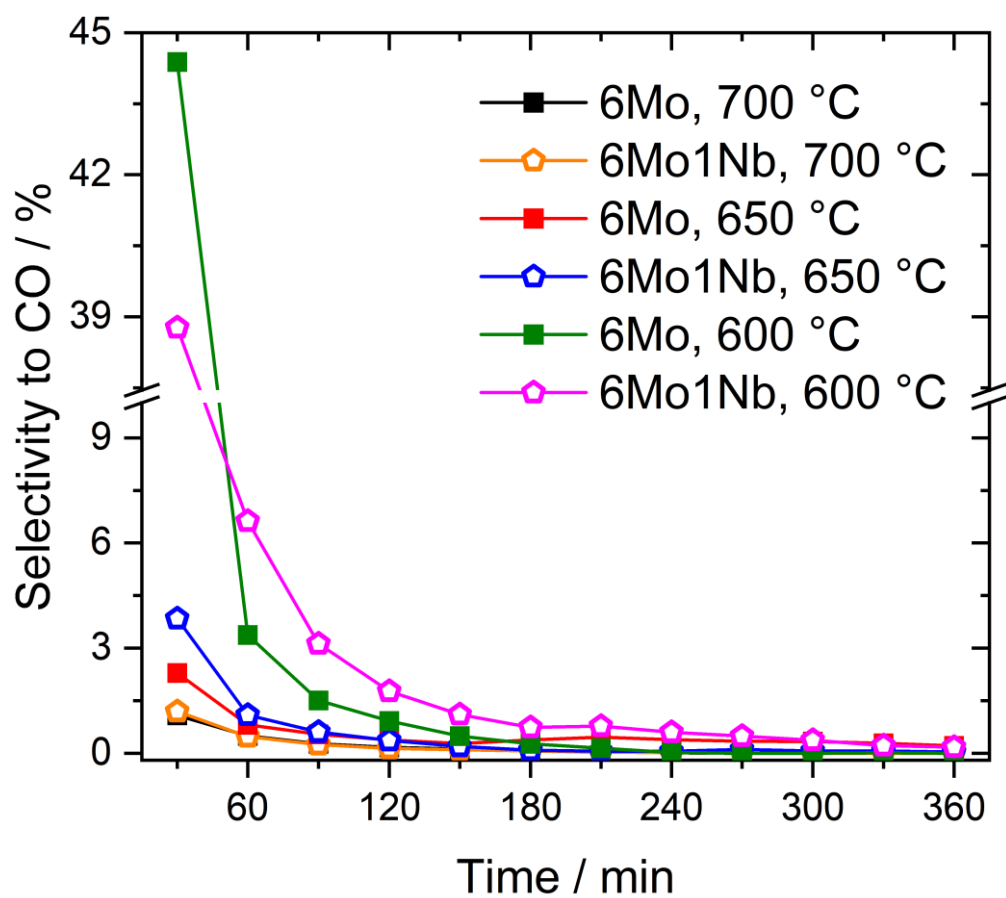

**Figure S10:** CO selectivities over time for MDA on 6Mo/HZSM-5 and 6Mo1Nb/HZSM-5 catalysts at different temperatures. Reaction conditions: 300 mg catalyst, 90 % CH<sub>4</sub> + 10 % N<sub>2</sub>, 3200 SCC g<sub>cat</sub><sup>-1</sup> h<sup>-1</sup>.

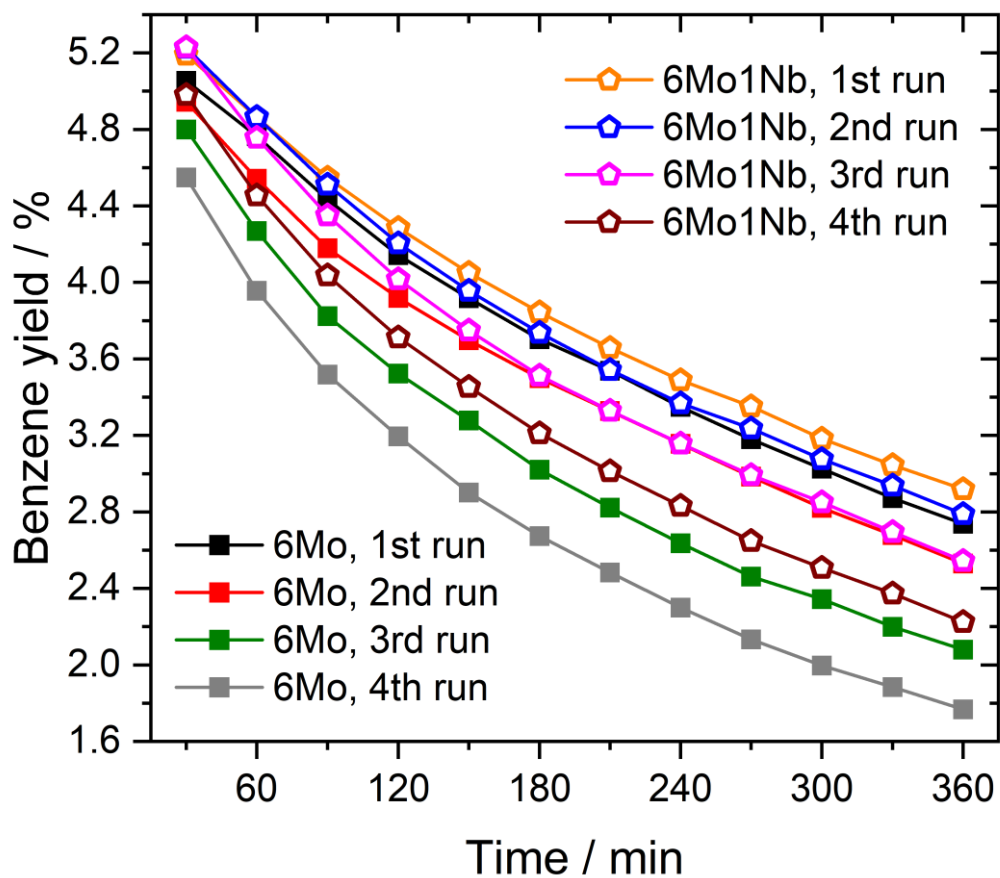

**Figure S11:** benzene yield over time for MDA over 6Mo/HZSM-5 and 6Mo1Nb/HZSM-5 catalysts in subsequent reaction-regeneration cycles. Reaction conditions: 700 °C, 300 mg catalyst, 90 % CH<sub>4</sub> + 10 % N<sub>2</sub>, 3200 SCC g<sub>cat</sub><sup>-1</sup> h<sup>-1</sup>. Regeneration: 450 °C, air, 1100 SCC g<sub>cat</sub><sup>-1</sup> h<sup>-1</sup>, 45 min.

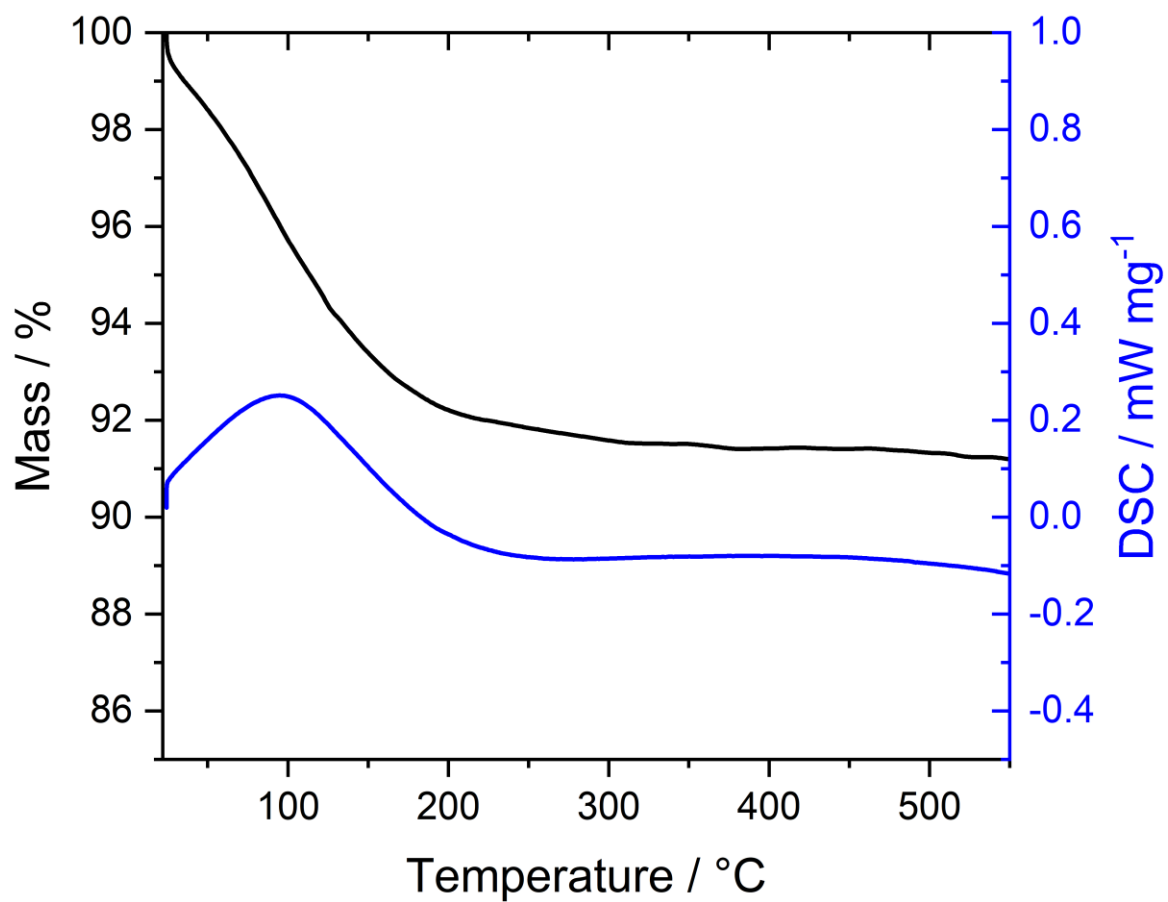

Figure S12: TGA (black) and DSC (blue) curves of fresh 6Mo/HZSM-5. The observed mass loss is related to atmospheric water adsorbed on the surface, inside the pore system and on acidic sites.<sup>3,4</sup>

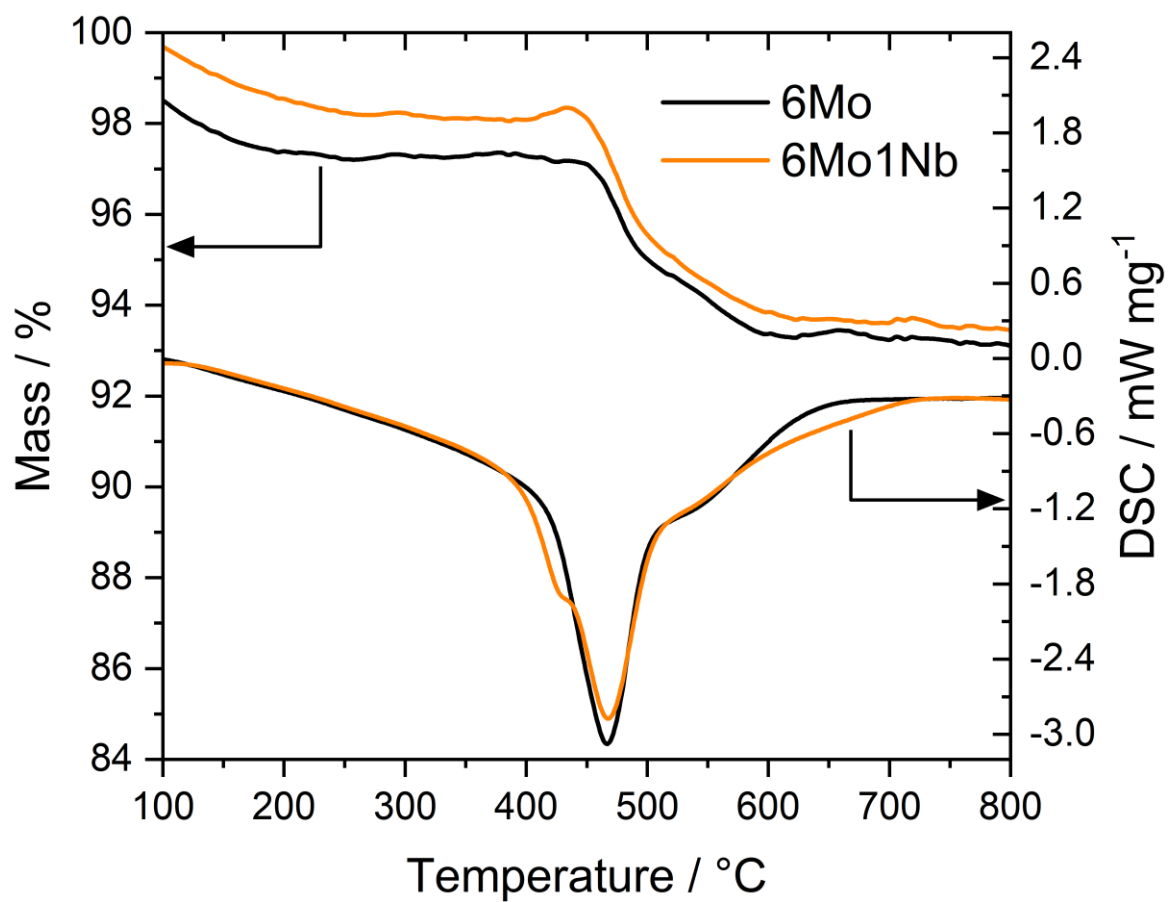

**Figure S13:** TGA (top curves) and DSC (bottom curves) measurements on spent 6Mo/HZSM-5 and 6Mo1Nb/HZSM-5 after reaction for 360 min. Reaction conditions: 700 °C, 300 mg catalyst, 90 % CH<sub>4</sub> + 10 % N<sub>2</sub>, 4800 SCC g<sub>cat</sub><sup>-1</sup> h<sup>-1</sup>, 1 atm.

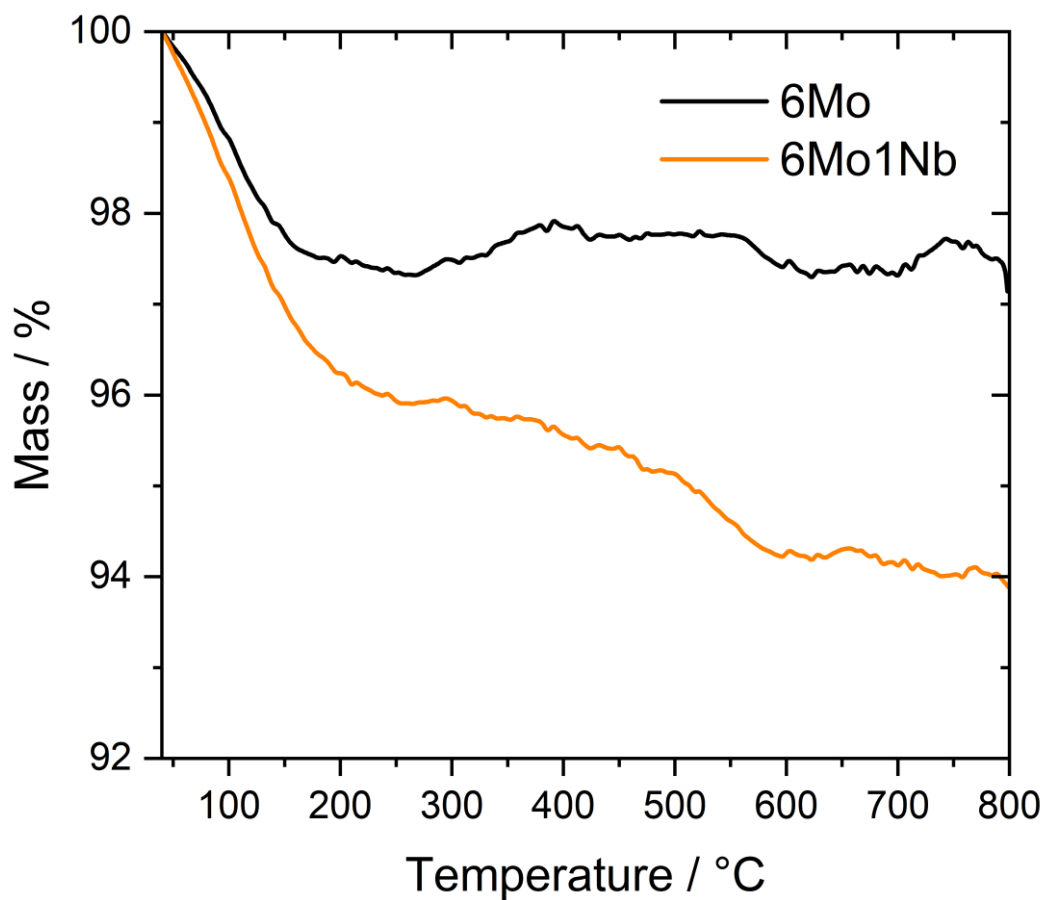

Figure S14: TGA of 6Mo/HZSM-5 and 6Mo1Nb/HZSM-5 after four reaction / regeneration cycles (total TOS 24 h). After the fourth reaction run, a final regeneration procedure was performed.

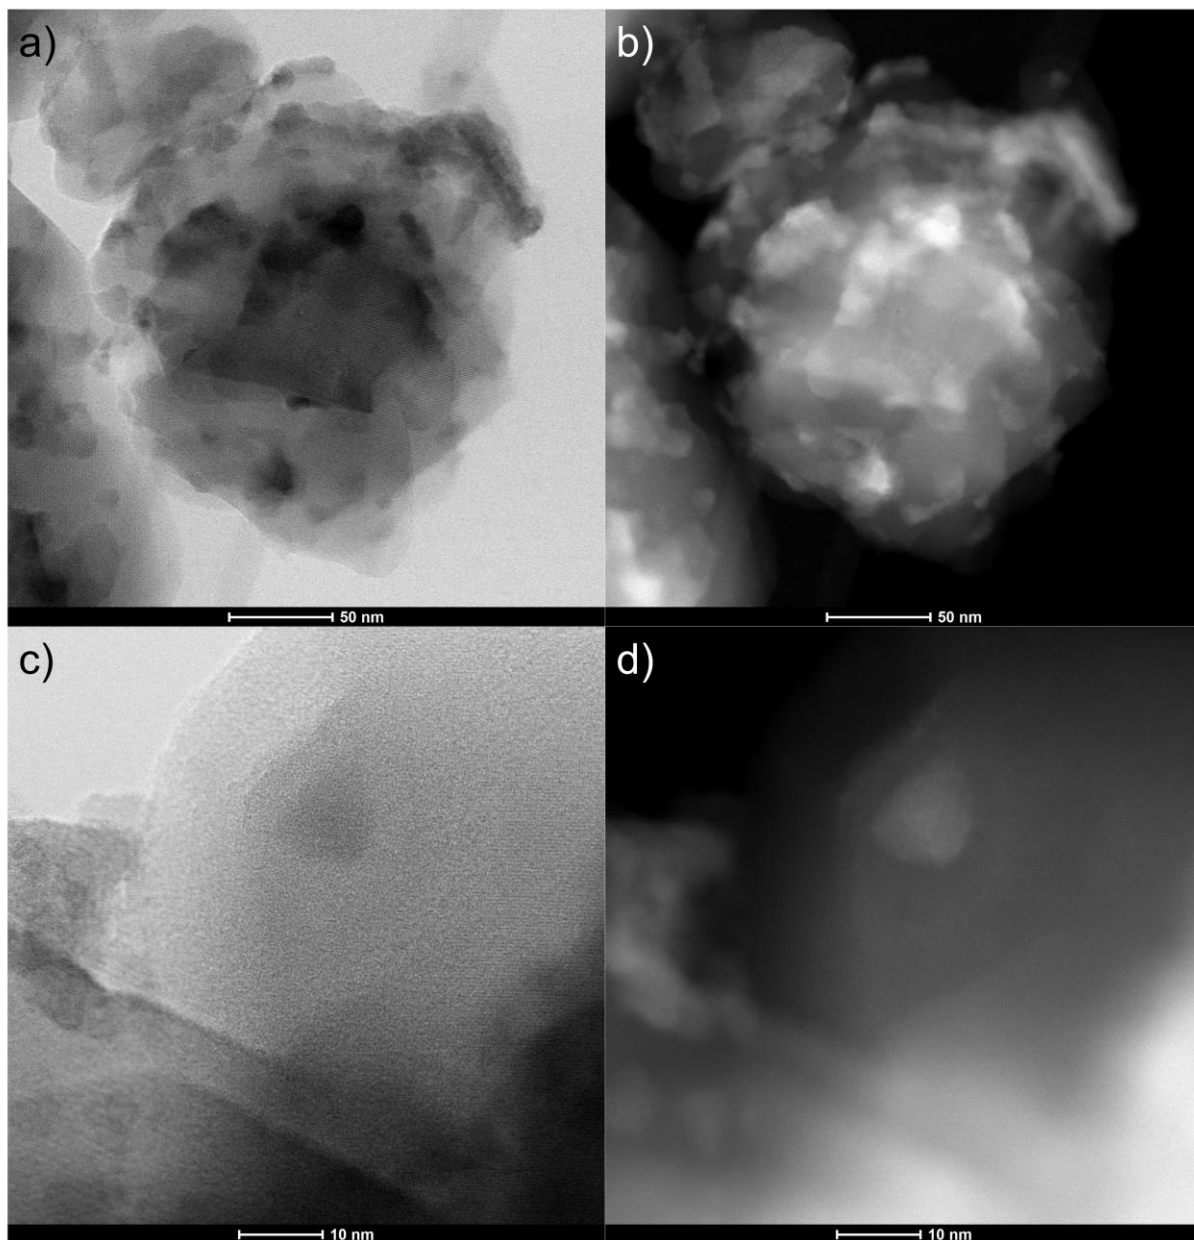

**Figure S15:** Additional overview STEM micrographs of the fresh (a: bright field (BF); b: dark field (HAADF)) and higher resolution images (c: BF; d: HAADF) of the fresh 6Mo1Nb/HZMS-5 catalyst.

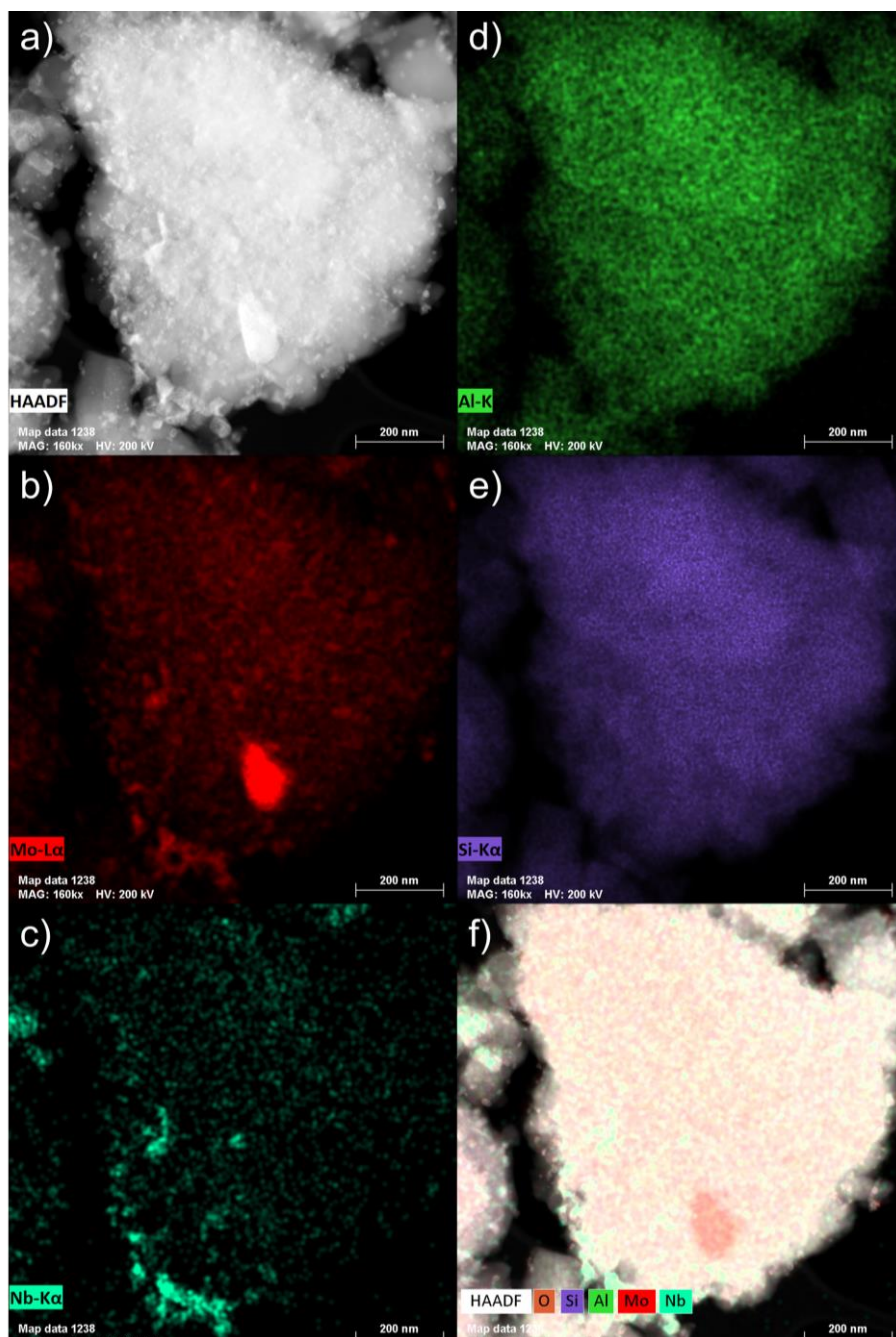

**Figure S16:** STEM micrograph (a) and corresponding EDS maps (b: Mo L $\alpha$ ; c: Nb K $\alpha$ ; d: Al K $\alpha$ ; e: Si K $\alpha$ ; f: overlay of O, Si, Al; Mo and Nb) of the spent 6Mo1Nb/HZSM-5 catalyst after reaction for 360 min on stream at 700 °C.

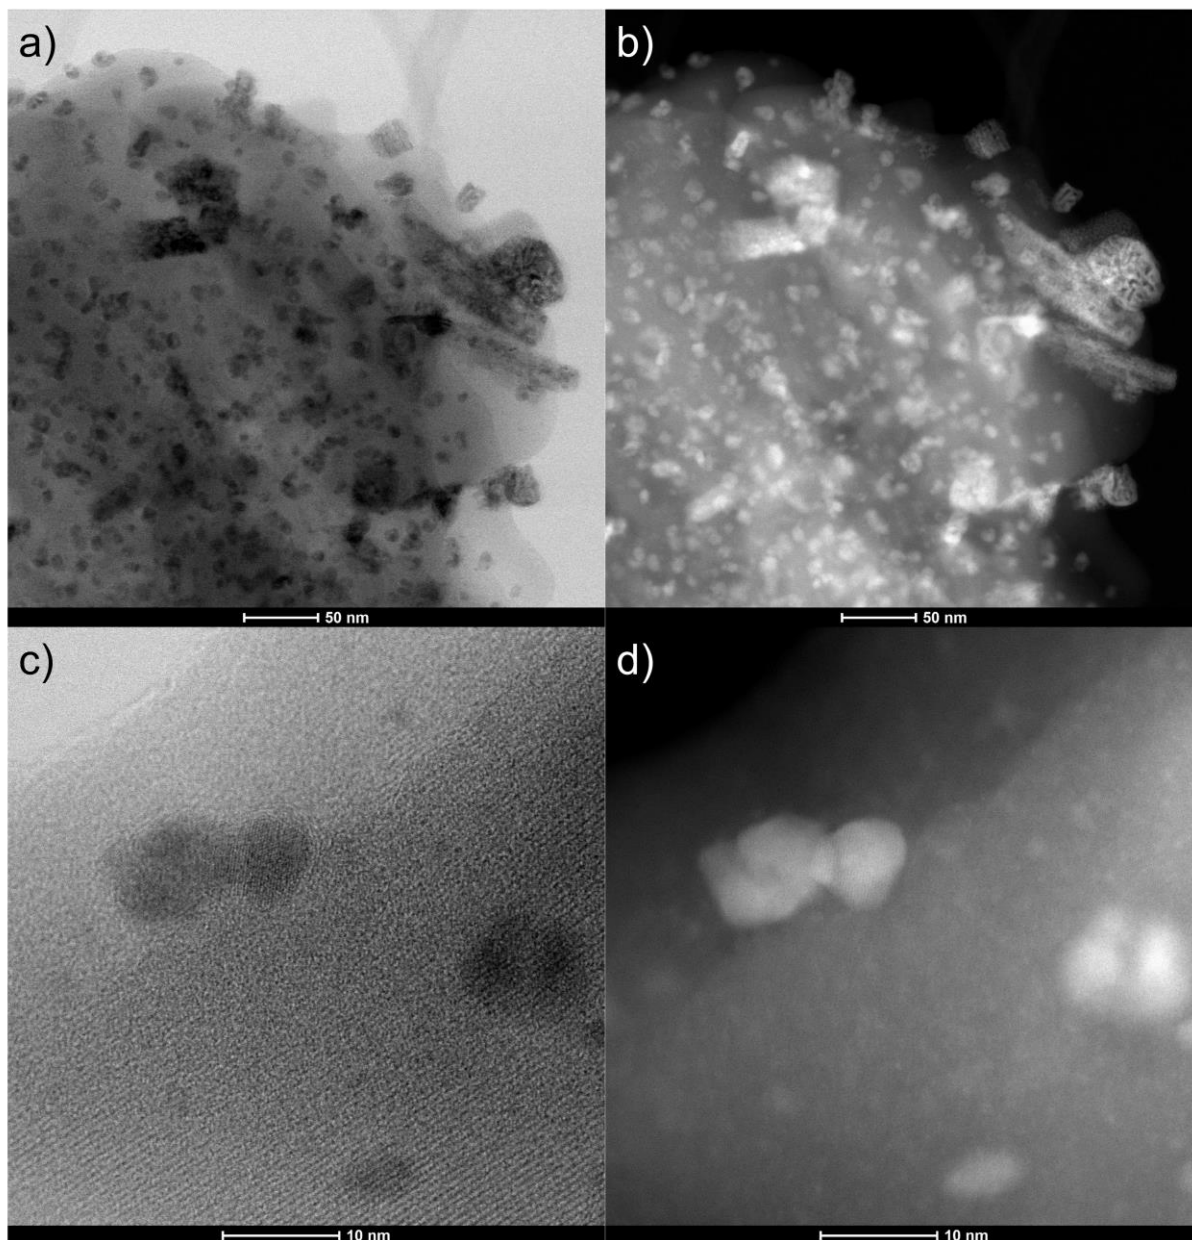

**Figure S17:** Additional overview STEM micrographs (a: bright field (BF); b: dark field (HAADF)) and higher resolution images (c: BF; d: HAADF) of the spent 6Mo1Nb/HZMS-5 catalyst after reaction for 360 min on stream at 700 °C.



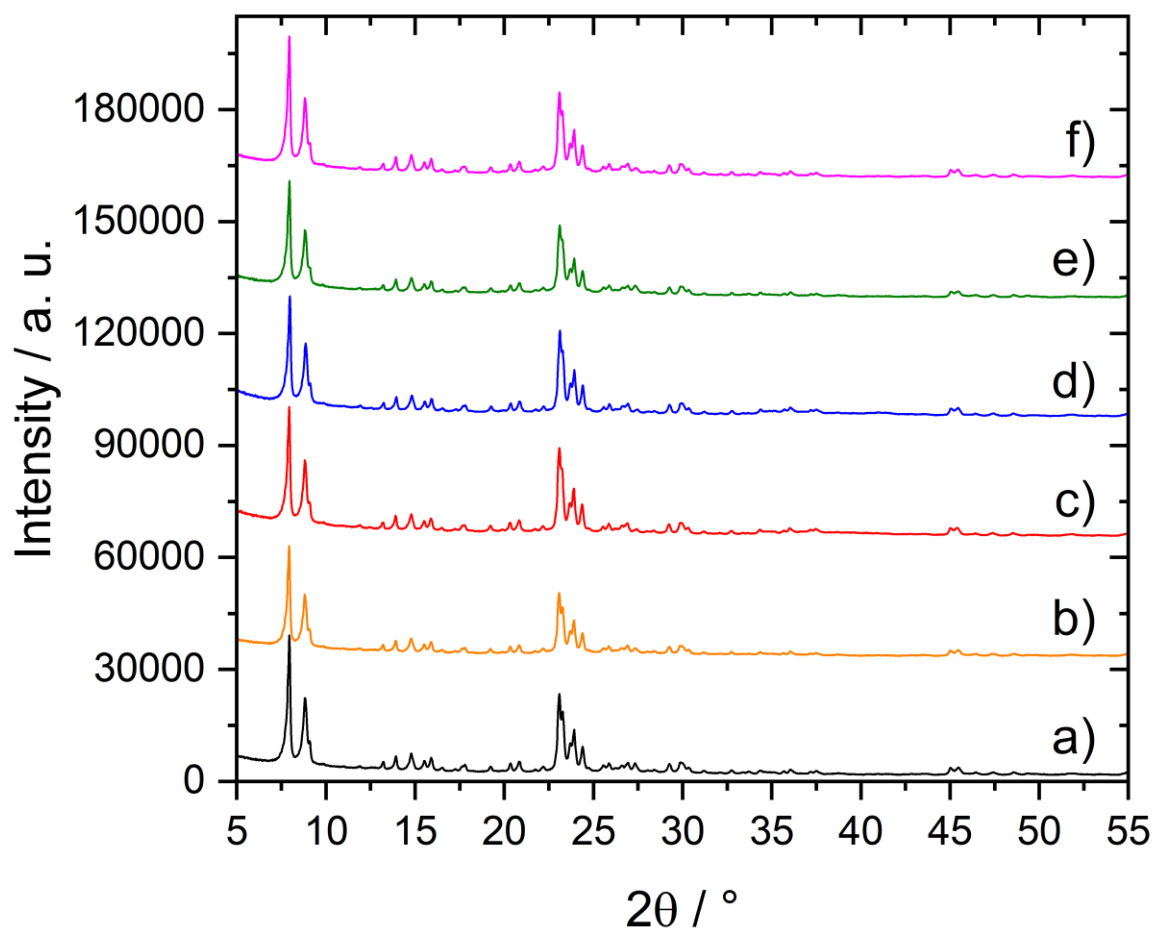

**Figure S18:** XRD patterns (obtained with Cu  $K\alpha$  radiation) of fresh 6Mo/HZSM-5 (a) and 6Mo1Nb/HZSM-5 (b), spent 6Mo/HZSM-5 (c) and 6Mo1Nb/HZSM-5 (d) as well as regenerated 6Mo/HZSM-5 (e) and 6Mo1Nb/HZSM-5 (f) catalyst samples. Intensities were not normalized.

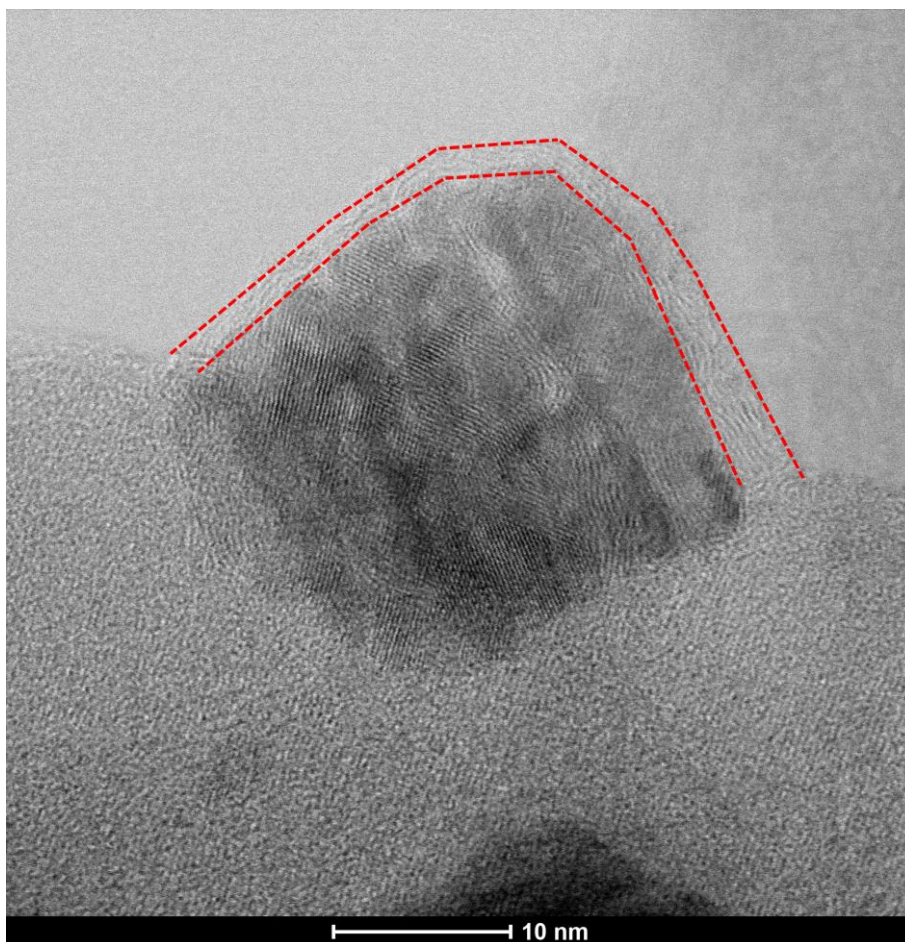

**Figure S19:** High resolution BF-STEM micrograph of the spent 6Mo1Nb/HZMS-5 catalyst showing the overgrowth of a thin carbon layer on the surface of MoNb nanoparticles (see additional discussion on the evaluation in Ref. <sup>1</sup>).

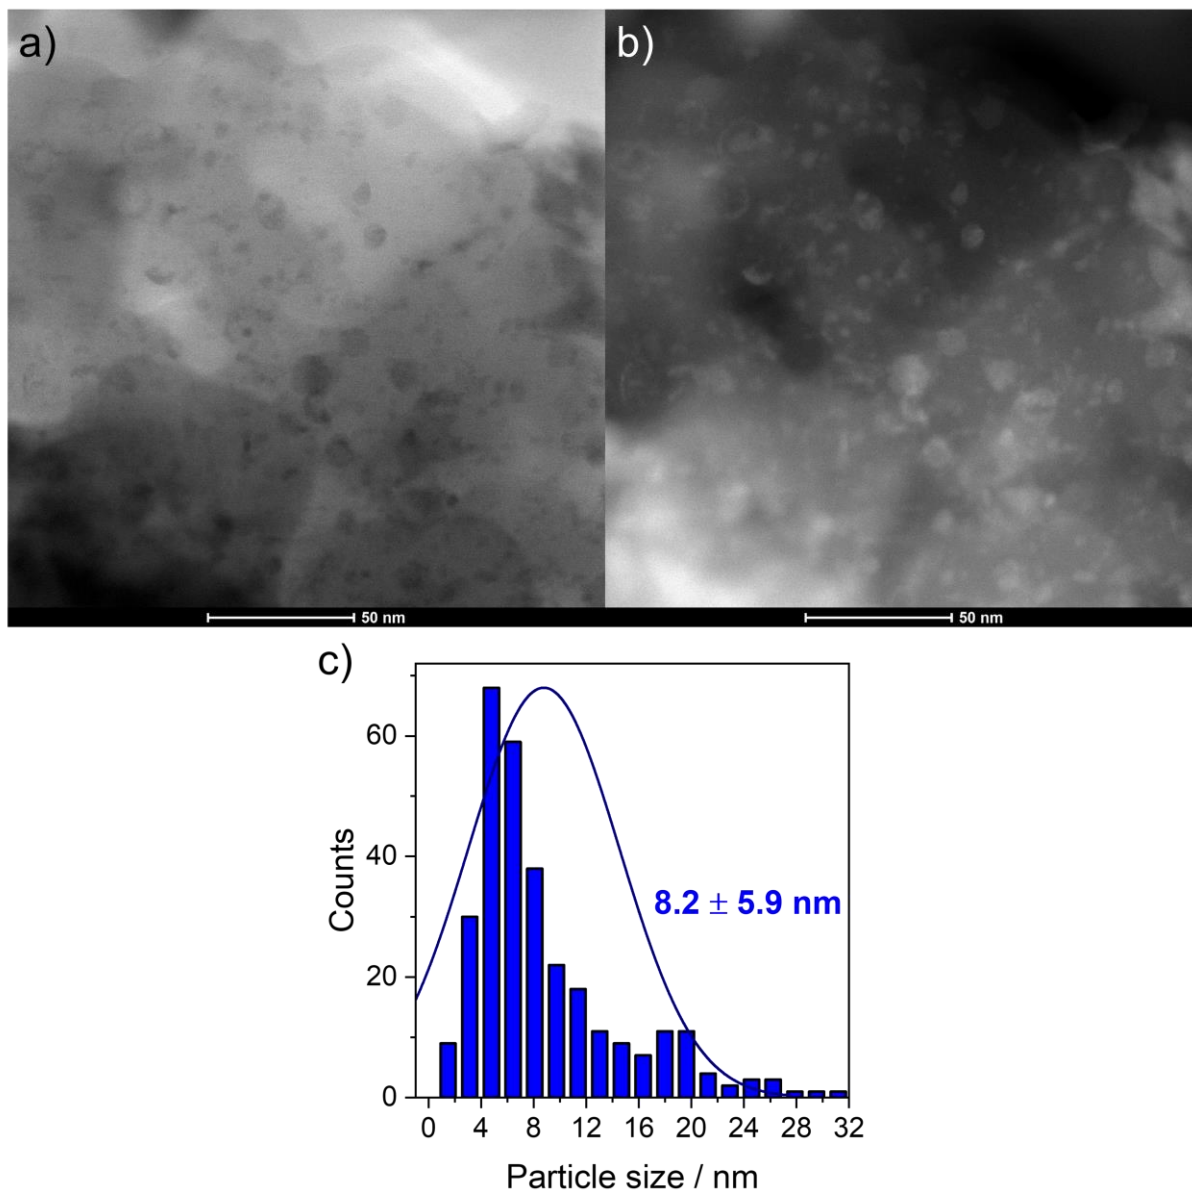

**Figure S20:** STEM micrographs of the regenerated 6Mo1Nb/HZMS-5 catalyst (a: bright field (BF); b: dark field (HAADF)), and (c) the corresponding particle size distribution.

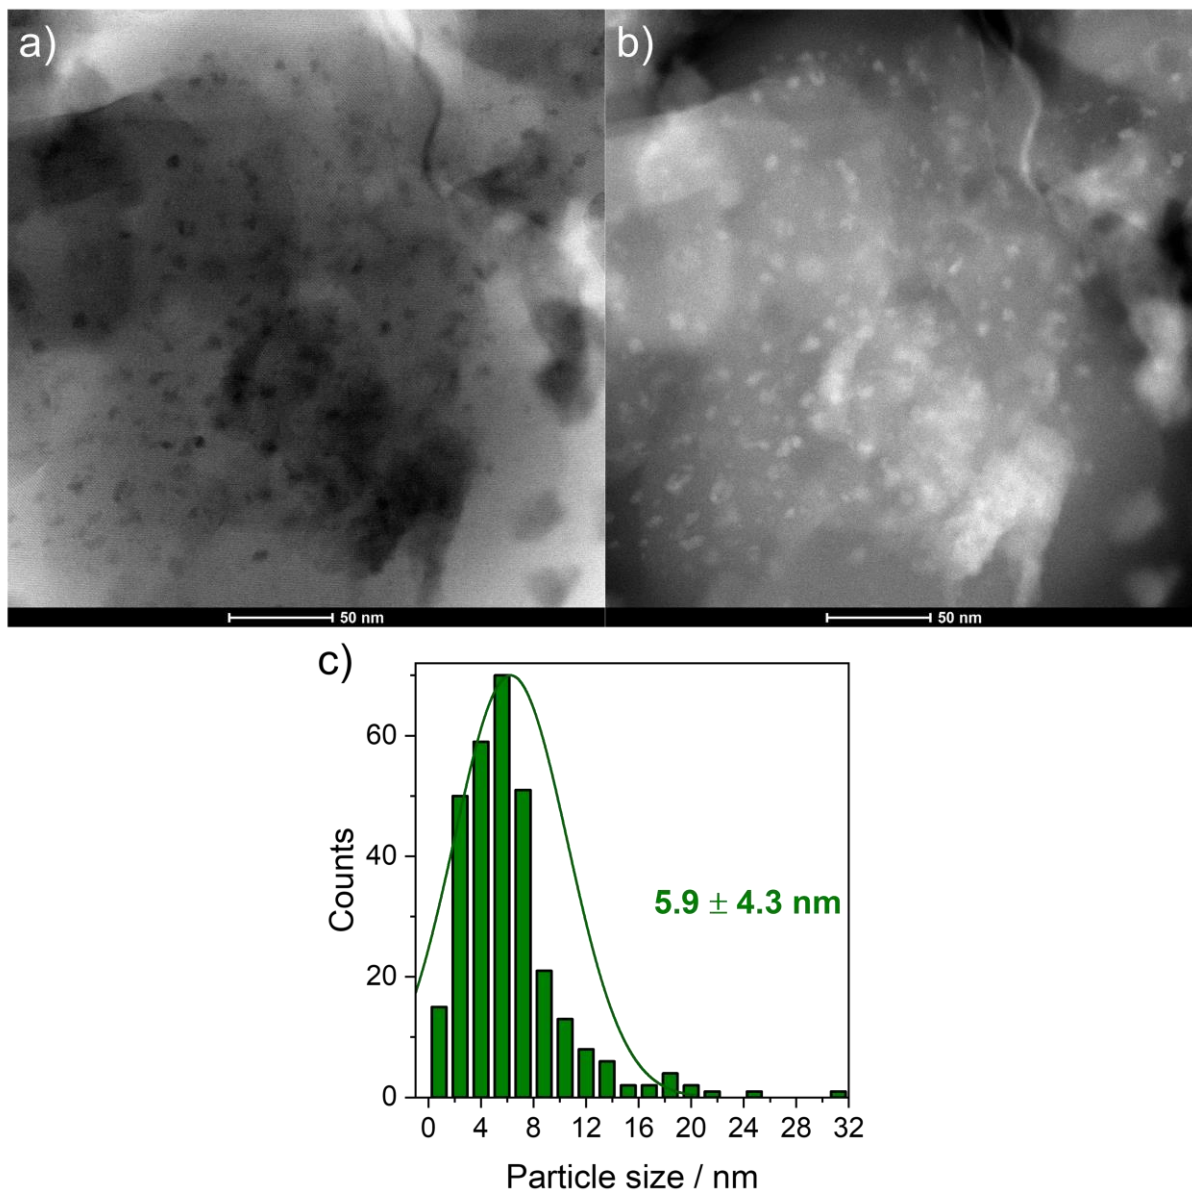

**Figure S21:** STEM micrographs of the regenerated 6Mo/HZMS-5 catalyst (a: bright field (BF); b: dark field (HAADF)), and (c) the corresponding particle size distribution.

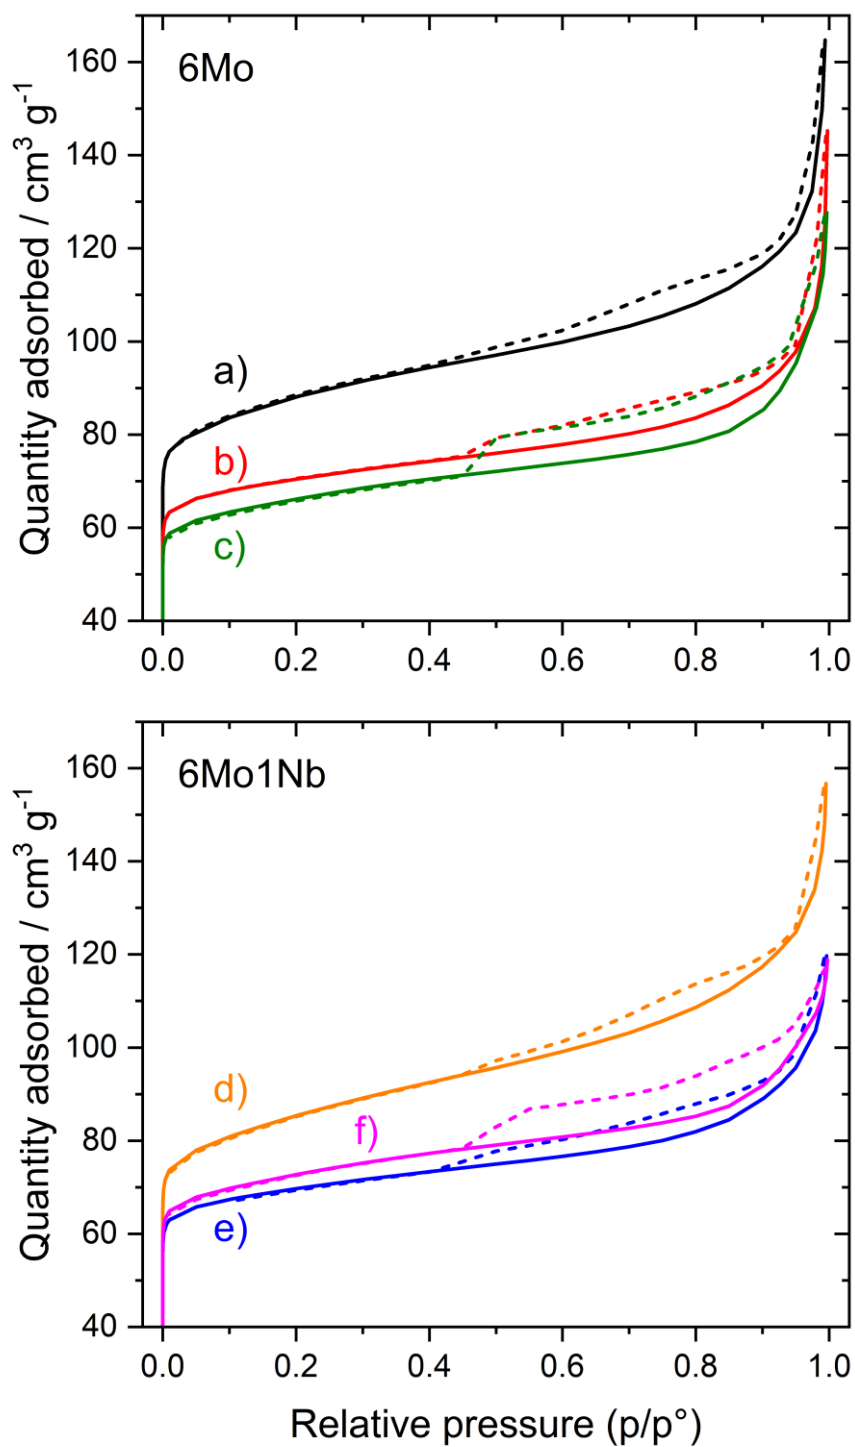

**Figure S22:** N<sub>2</sub> sorption isotherms recorded according to the BET method. Top: fresh (a), spent (b) and regenerated (c) 6Mo/HZSM-5; bottom: fresh (d), spent (e) and regenerated (f) 6Mo1Nb/HZSM-5. Calculated characteristics like specific surface areas and micropore volumes are given in Table S3.

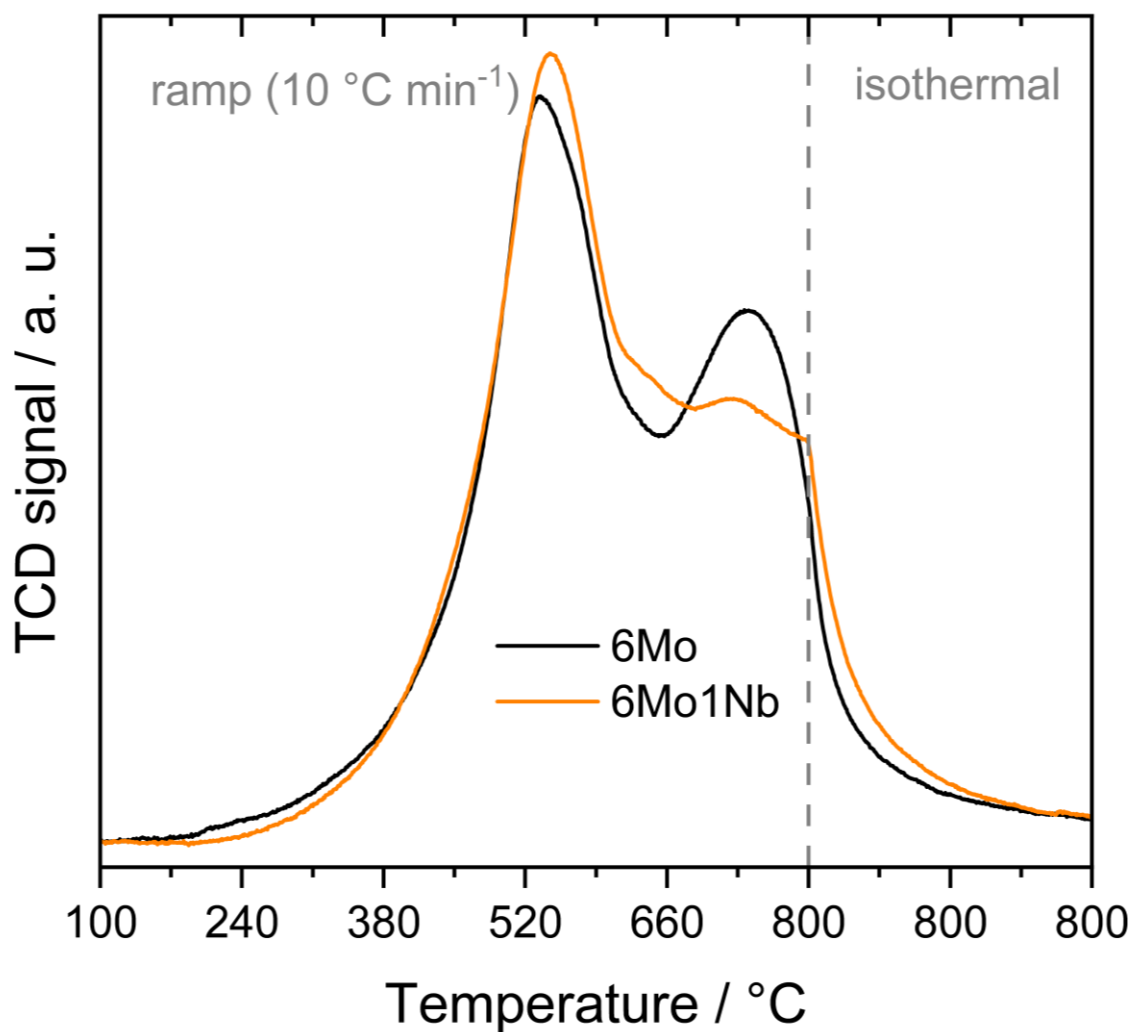

**Figure S23:** Recorded temperature-programmed reduction (TPR) curves in 5 % H<sub>2</sub>/N<sub>2</sub> for fresh 6Mo/HZSM-5 and 6Mo1Nb/HZSM-5 catalysts.

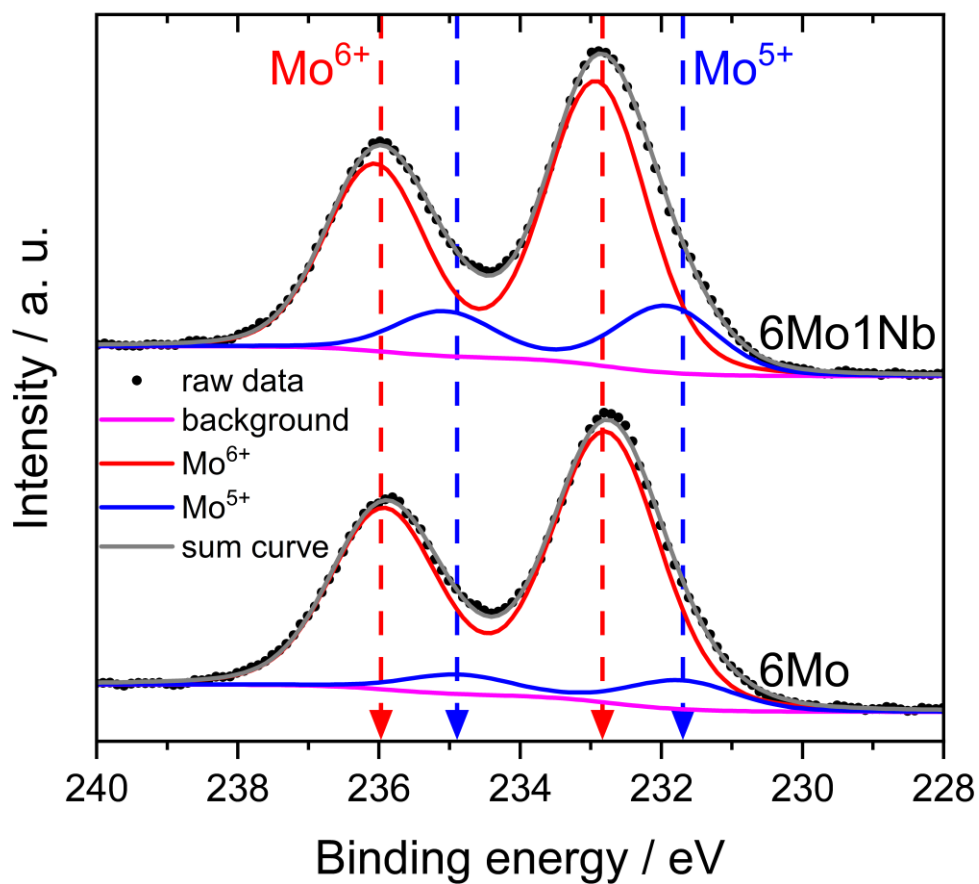

**Figure S24:** Normalized X-ray photoelectron spectra (XPS) for the Mo 3d level of 6Mo/HZSM-5 and 6Mo1Nb/HZSM-5 catalysts after four reaction / regeneration cycles. Reaction conditions: 700°C, 300 mg catalyst, 90 % CH<sub>4</sub> + 10 % N<sub>2</sub>, 3200 SCC g<sub>cat</sub><sup>-1</sup> h<sup>-1</sup>, 6 h; Regeneration conditions: 450°C, air, 1100 SCC g<sub>cat</sub><sup>-1</sup> h<sup>-1</sup>, 45 min.

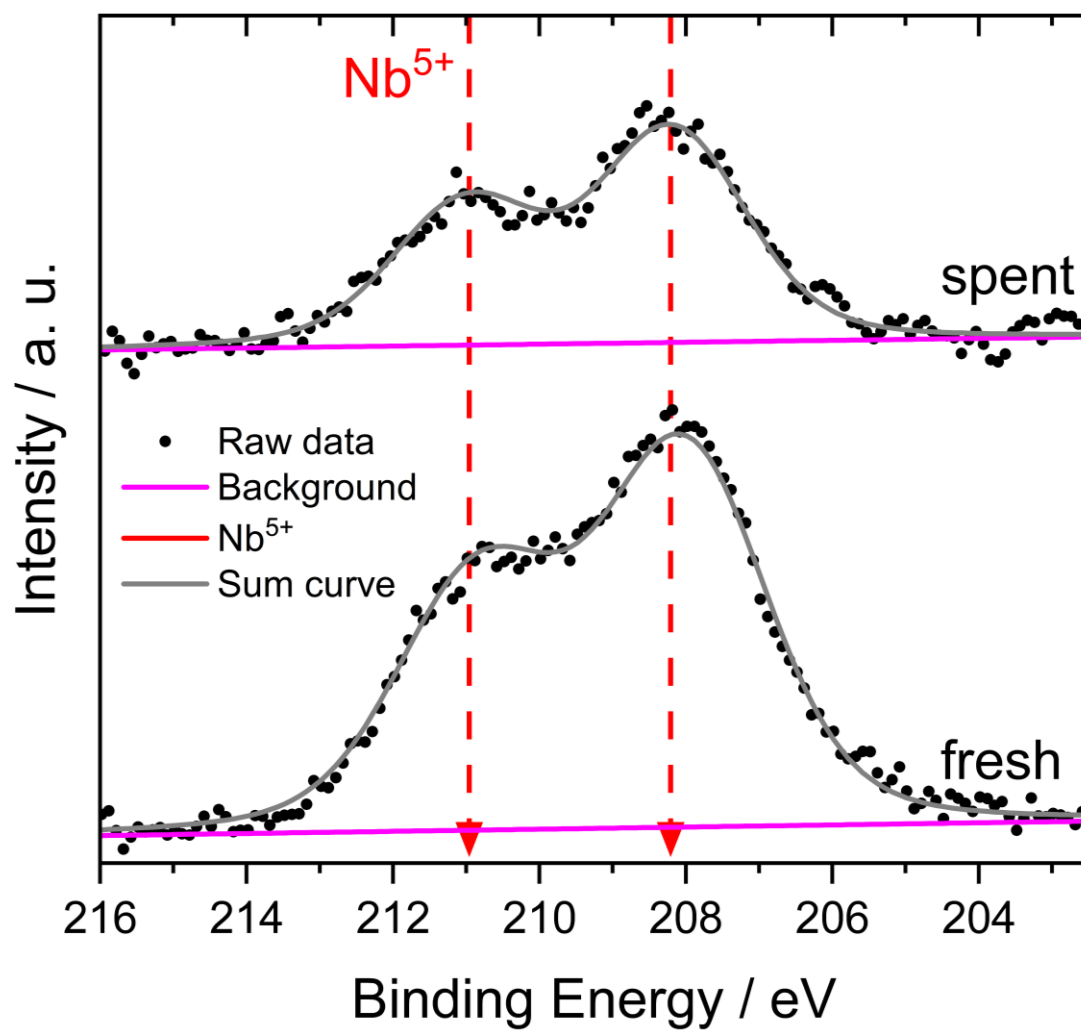

**Figure S25:** XPS for the Nb 3d level of 1Nb/HZSM-5 before and after reaction with methane. Reaction conditions: 700 °C, 300 mg catalyst, 90 % CH<sub>4</sub> + 10 % N<sub>2</sub>, 3200 SCC g<sub>cat</sub><sup>-1</sup> h<sup>-1</sup>, 6 h. Intensities were not normalized. Dashed arrows were added as a visual guide.



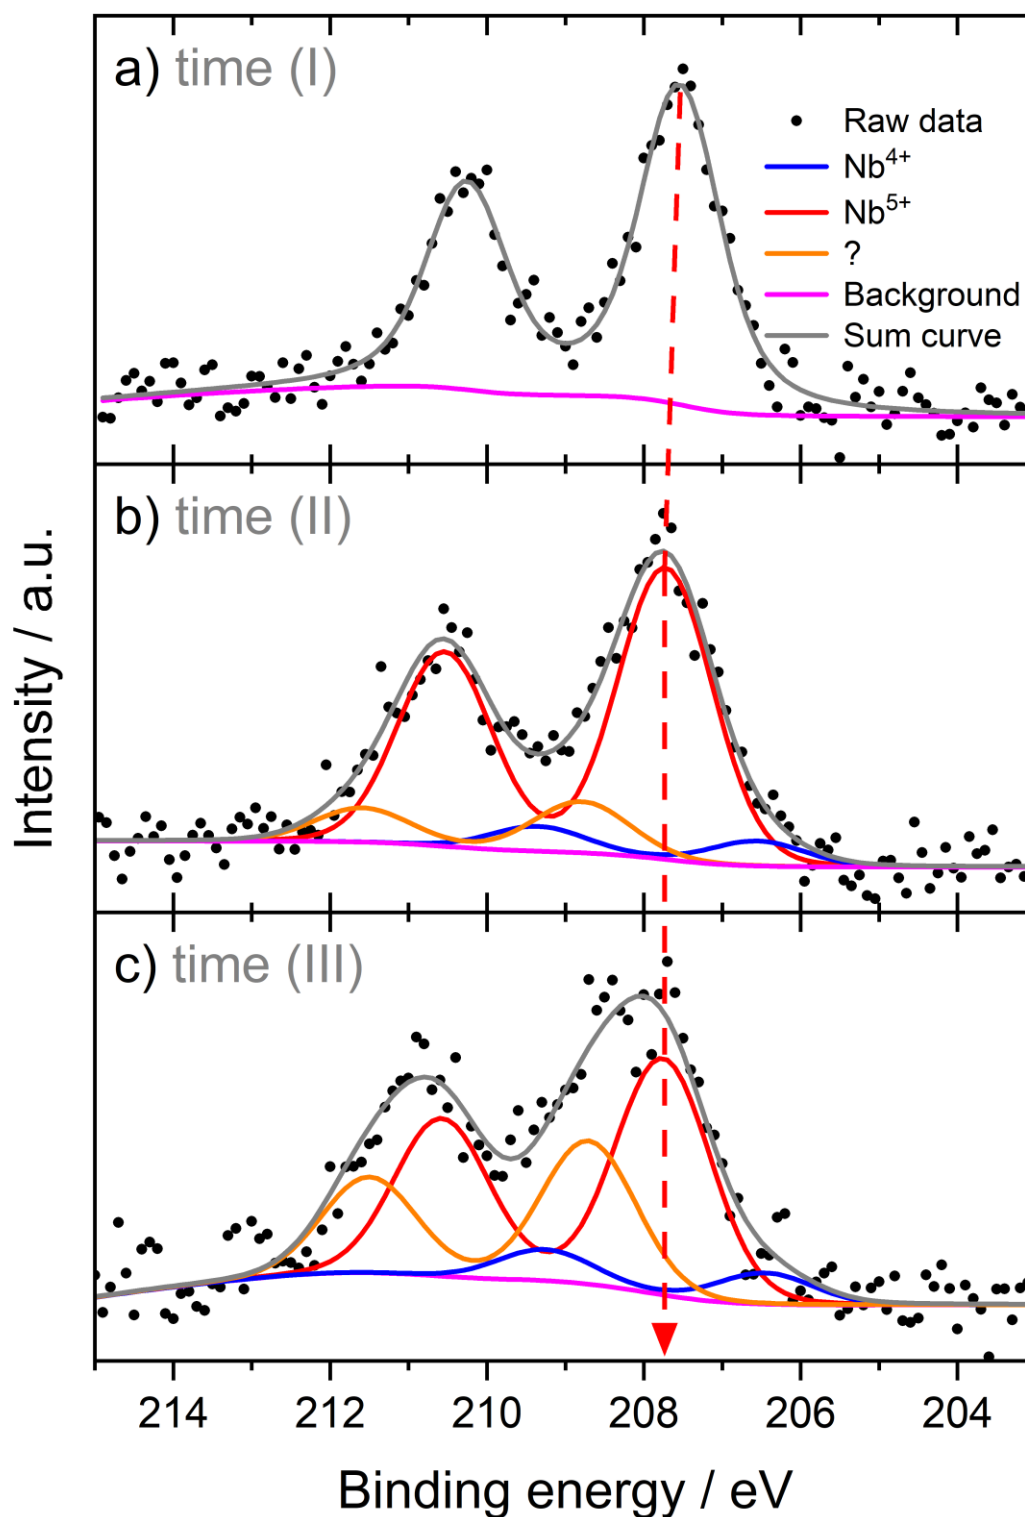

**Figure S26:** *In situ* collected Nb 3d spectra at different times (a: time (I) - 55 min @ 127 °C; b: time (II) - 2.0 h @ 627 °C; c: time (III) - 7.2 h @ 627 °C) during the NAP-XPS study of 6Mo1Nb/HZSM-5 at a total pressure of 2 mbar in the reaction atmosphere 90 % CH<sub>4</sub> / 10 % N<sub>2</sub>. Times are given in relative time (see Figure 8e in the main manuscript).

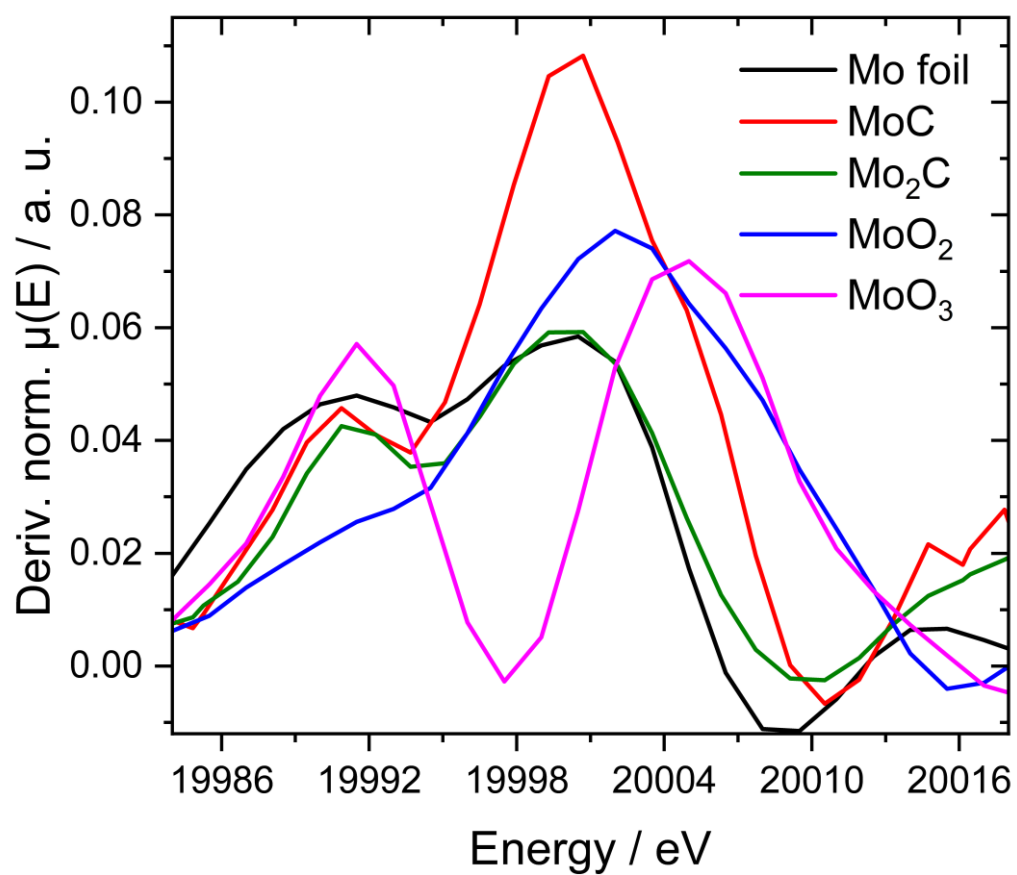

**Figure S27:** derivative XANES spectra of selected Mo reference materials (see further information on evaluation of the spectra in Ref. <sup>2</sup>).

**References:**

1. S. Peters, C. Rieg, S. Bartling, M. Parlinska-Wojtan, M. Dyballa, S. Wohlrab and A. M. Abdel-Mageed, *ACS Catal.*, 2023, DOI: 10.1021/acscatal.3c02385, 13056-13070.
2. S. Peters, B. Kunkel, C. T. Cakir, A. Kabelitz, S. Witte, T. Bernstein, S. Bartling, M. Radtke, F. Emmerling and A. M. Abdel-Mageed, *Chem. Commun.*, 2023, **59**, 12120-12123.
3. A. Jentys, G. Warecka, M. Derewinski and J. A. Lercher, *J. Phys. Chem.*, 1989, **93**, 4837-4843.
4. C. Bornes, J. A. Amelse, M. Peacock, C. L. Marshall, M. M. Schwartz, C. F. G. C. Geraldes, J. Rocha and L. Mafra, *Eur. J. Inorg. Chem.*, 2020, **2020**, 1860-1866.
